# Supplementary material for: Use of Electronic Loggers to Measure Changes in the Rates of Hand Washing with Soap in Low-Income Urban Households in India
Source: PLoS One. 2015 Jun 23;10(6):e0131187. doi: 10.1371/journal.pone.0131187 (PMC4477904; doi:10.1371/journal.pone.0131187)
Supplement: S1 File — (XLSX) [file pone.0131187.s001.xlsx]

## Sheet: Sheet1
	Age	1 to 5		6 to 11		12 to 20		21+
Household	Arm	M	F	M	F	M	F	M	F	Household size
2	In Bath	0	0	0	1	1	0	1	1	4
3	In Bath	0	0	2	0	0	0	1	2	5
4	In Bath	0	0	2	0	0	0	1	1	4
5	In Bath	1	1	1	0	0	0	1	2	6
6	In Bath	0	0	0	2	0	0	1	1	4
8	In Bath	0	0	0	1	0	0	0	2	3
10	In Bath	0	0	0	1	1	0	1	2	5
12	In Bath	0	0	1	0	1	1	1	1	5
14	In Bath	0	0	1	1	0	0	1	2	5
16	In Bath	0	0	0	1	0	0	1	1	3
18	In Bath	0	0	1	0	0	0	1	1	3
22	In Bath	0	1	1	0	0	0	1	1	4
24	In Bath	0	0	1	0	0	1	0	1	3
26	In Bath	0	1	0	1	0	0	2	2	6
43	In Bath	0	0	0	1	0	1	0	2	4
45	In Bath	1	0	2	0	0	0	2	3	8
54	In Bath	0	1	0	1	0	0	2	2	6
56	In Bath	0	0	0	1	0	0	3	2	6
58	In Bath	0	0	1	1	0	1	0	2	5
60	In Bath	0	0	1	1	0	0	1	2	5
7	By toilet	0	0	0	2	0	0	0	3	5
9	By toilet	0	0	1	0	0	1	1	1	4
11	By toilet	0	0	0	2	2	2	1	2	9
13	By toilet	0	0	1	0	1	0	0	1	3
15	By toilet	0	1	1	0	0	0	2	3	7
17	By toilet	0	0	2	1	0	0	0	1	4
27	By toilet	1	0	1	0	0	0	1	1	4
29	By toilet	0	0	2	0	0	1	1	2	6
31	By toilet	0	0	0	1	0	1	1	1	4
35	By toilet	0	1	0	1	0	0	1	1	4
37	By toilet	0	1	1	0	0	0	1	2	5
39	By toilet	0	1	2	0	0	0	1	1	5
41	By toilet	1	0	1	0	0	0	1	1	4
51	By toilet	0	0	1	1	0	0	1	1	4
52	By toilet	0	0	2	0	0	0	2	3	7
53	By toilet	0	0	0	1	1	0	1	2	5
55	By toilet	0	0	0	1	0	0	0	1	2
59	By toilet	0	0	1	1	0	0	1	1	4
