# Supplementary material for: Use of Electronic Loggers to Measure Changes in the Rates of Hand Washing with Soap in Low-Income Urban Households in India
Source: PLoS One. 2015 Jun 23;10(6):e0131187. doi: 10.1371/journal.pone.0131187 (PMC4477904; doi:10.1371/journal.pone.0131187)
Supplement: S2 File — (XLSX) [file pone.0131187.s002.xlsx]

## Sheet: SoapJugEvents (2)
Logger	HH	Logged item	Date	Time	Duration	Associated	Red.soap
2075	2	Jug	2011-11-30	10:50:26	3.7	NA	1		A Logger ID
2075	2	Jug	2011-11-30	10:58:50	58.16	white	1		B Household Identifier
2075	2	Jug	2011-11-30	11:02:58	5.71	red	1		C Logged item
2075	2	Jug	2011-11-30	11:04:32	5.8	NA	1		D Date of record
2075	2	Jug	2011-11-30	11:40:43	84.08	NA	1		E Time of record
2075	2	Jug	2011-11-30	12:04:30	8.51	NA	1		F Duration of activity
2075	2	Jug	2011-11-30	12:29:57	36.94	red	1		G Association with other logged item (NA = No Association)
2075	2	Jug	2011-11-30	12:46:54	11.16	NA	1		H Arm 1 = Soap in Bathroom; 2 = Soap by toilet
2075	2	Jug	2011-11-30	15:36:16	4.4	NA	1
2075	2	Jug	2011-11-30	15:58:47	79.28	white	1
2075	2	Jug	2011-11-30	16:02:38	59.06	NA	1
2075	2	Jug	2011-11-30	16:47:51	18.91	white	1
2075	2	Jug	2011-11-30	19:23:30	3.91	NA	1
2075	2	Jug	2011-11-30	19:26:39	42.19	NA	1
2075	2	Jug	2011-11-30	20:15:13	9.46	NA	1
2075	2	Jug	2011-11-30	21:08:07	53.7	white	1
2075	2	Jug	2011-11-30	21:12:40	22.92	NA	1
2075	2	Jug	2011-11-30	21:35:21	39.59	NA	1
2075	2	Jug	2011-11-30	22:04:08	54	white	1
2075	2	Jug	2011-11-30	22:08:58	36.89	NA	1
2075	2	Jug	2011-11-30	22:18:19	22.02	NA	1
2075	2	Jug	2011-11-30	22:24:45	37.84	NA	1
2075	2	Jug	2011-11-30	22:31:12	6.6	NA	1
2075	2	Jug	2011-12-01	03:30:13	7.81	NA	1
2075	2	Jug	2011-12-01	07:15:57	12.31	NA	1
2075	2	Jug	2011-12-01	07:44:17	24.88	NA	1
2075	2	Jug	2011-12-01	07:46:27	69.16	NA	1
2075	2	Jug	2011-12-01	07:50:56	2.06	NA	1
2075	2	Jug	2011-12-01	07:56:36	18.81	NA	1
2075	2	Jug	2011-12-01	08:24:45	131.53	NA	1
2075	2	Jug	2011-12-01	08:32:43	114.31	NA	1
2075	2	Jug	2011-12-01	08:40:18	40.94	NA	1
2075	2	Jug	2011-12-01	09:51:51	32.94	NA	1
2075	2	Jug	2011-12-01	10:30:14	7.86	NA	1
2075	2	Jug	2011-12-01	10:42:15	13.92	NA	1
2075	2	Jug	2011-12-01	10:51:03	46.69	NA	1
2075	2	Jug	2011-12-01	12:19:23	5.51	NA	1
2075	2	Jug	2011-12-01	12:27:44	24.42	NA	1
2075	2	Jug	2011-12-01	12:54:57	37.24	NA	1
2075	2	Jug	2011-12-01	12:56:44	22.02	NA	1
2075	2	Jug	2011-12-01	12:58:14	90.84	NA	1
2075	2	Jug	2011-12-01	13:15:05	9.66	NA	1
2075	2	Jug	2011-12-01	13:46:36	27.57	NA	1
2075	2	Jug	2011-12-01	13:49:55	19.07	NA	1
2075	2	Jug	2011-12-01	13:53:22	95.19	NA	1
2075	2	Jug	2011-12-01	14:20:33	41.84	NA	1
2075	2	Jug	2011-12-01	14:24:55	20.72	NA	1
2075	2	Jug	2011-12-01	14:29:26	134.58	NA	1
2075	2	Jug	2011-12-01	14:38:51	5.11	NA	1
2075	2	Jug	2011-12-01	16:26:53	33.28	NA	1
2075	2	Jug	2011-12-01	17:24:48	19.77	NA	1
2075	2	Jug	2011-12-01	17:46:27	11.11	NA	1
2075	2	Jug	2011-12-01	17:50:48	7.86	NA	1
2075	2	Jug	2011-12-01	18:36:17	12.26	NA	1
2075	2	Jug	2011-12-01	18:46:21	25.03	NA	1
2075	2	Jug	2011-12-01	20:51:08	7.4	NA	1
2075	2	Jug	2011-12-01	21:17:58	85.94	NA	1
2075	2	Jug	2011-12-01	21:48:34	16.81	NA	1
2075	2	Jug	2011-12-01	22:48:55	36.24	NA	1
2075	2	Jug	2011-12-01	22:51:26	11.46	NA	1
2075	2	Jug	2011-12-01	22:54:42	70.97	NA	1
2075	2	Jug	2011-12-01	22:58:22	11.41	NA	1
2075	2	Jug	2011-12-01	23:00:18	17.17	NA	1
2075	2	Jug	2011-12-01	23:02:51	42.99	red	1
2075	2	Jug	2011-12-01	23:23:24	1.9	NA	1
2075	2	Jug	2011-12-01	23:36:33	18.17	NA	1
2075	2	Jug	2011-12-02	06:09:35	15.26	NA	1
2075	2	Jug	2011-12-02	06:28:40	25.98	NA	1
2075	2	Jug	2011-12-02	07:01:13	6.95	NA	1
2075	2	Jug	2011-12-02	07:02:27	35.64	white	1
2075	2	Jug	2011-12-02	07:05:02	43.29	NA	1
2075	2	Jug	2011-12-02	07:16:25	124.32	NA	1
2075	2	Jug	2011-12-02	07:55:42	7.61	NA	1
2075	2	Jug	2011-12-02	09:16:04	3.6	NA	1
2075	2	Jug	2011-12-02	09:48:36	2.05	NA	1
2075	2	Jug	2011-12-02	10:34:21	9.76	NA	1
2075	2	Jug	2011-12-02	14:49:45	10.96	NA	1
2075	2	Jug	2011-12-02	15:32:46	35.54	NA	1
2075	2	Jug	2011-12-02	16:12:32	7.16	NA	1
2075	2	Jug	2011-12-02	18:43:48	9.66	NA	1
2075	2	Jug	2011-12-02	19:25:50	5.65	NA	1
2075	2	Jug	2011-12-03	01:00:59	7.41	NA	1
2075	2	Jug	2011-12-03	05:19:36	35.58	NA	1
2075	2	Jug	2011-12-03	09:08:00	110.96	white	1
2075	2	Jug	2011-12-03	09:11:42	74.07	NA	1
2075	2	Jug	2011-12-03	10:02:48	80.38	NA	1
2075	2	Jug	2011-12-03	19:13:30	20.92	NA	1
2075	2	Jug	2011-12-04	08:40:06	1.35	NA	1
2075	2	Jug	2011-12-04	09:19:18	12.22	NA	1
2075	2	Jug	2011-12-04	16:14:05	13.21	NA	1
2075	2	Jug	2011-12-04	16:37:16	8.76	NA	1
2075	2	Jug	2011-12-05	07:22:50	14.21	red	1
2075	2	Jug	2011-12-05	08:09:06	3.55	NA	1
2078	3	Jug	2011-11-30	11:50:13	1.35	white	1
2078	3	Jug	2011-11-30	11:52:41	41.89	NA	1
2078	3	Jug	2011-12-01	05:30:34	56.36	NA	1
2078	3	Jug	2011-12-01	06:24:23	35.48	NA	1
2078	3	Jug	2011-12-01	07:59:58	2.8	NA	1
2078	3	Jug	2011-12-01	08:07:29	187.49	red	1
2078	3	Jug	2011-12-01	08:12:49	27.17	NA	1
2078	3	Jug	2011-12-01	08:15:15	7.56	NA	1
2078	3	Jug	2011-12-01	08:16:33	30.93	NA	1
2078	3	Jug	2011-12-01	08:20:04	30.93	white	1
2078	3	Jug	2011-12-01	08:25:10	29.38	white	1
2078	3	Jug	2011-12-01	17:25:47	34.88	NA	1
2078	3	Jug	2011-12-02	05:52:24	79.88	NA	1
2078	3	Jug	2011-12-02	06:49:12	21.07	NA	1
2078	3	Jug	2011-12-02	06:53:02	48.75	NA	1
2078	3	Jug	2011-12-02	08:19:56	45.99	NA	1
2078	3	Jug	2011-12-02	08:22:39	31.48	NA	1
2078	3	Jug	2011-12-02	17:30:57	23.73	NA	1
2078	3	Jug	2011-12-03	09:00:42	6.05	NA	1
2078	3	Jug	2011-12-03	17:32:28	20.62	NA	1
2078	3	Jug	2011-12-03	19:30:55	18.17	NA	1
2078	3	Jug	2011-12-03	22:00:34	59.46	NA	1
2078	3	Jug	2011-12-03	22:03:48	20.62	NA	1
2078	3	Jug	2011-12-04	06:04:07	18.57	NA	1
2078	3	Jug	2011-12-04	08:23:00	35.58	NA	1
2078	3	Jug	2011-12-04	08:25:01	19.82	NA	1
2078	3	Jug	2011-12-04	09:59:44	18.47	NA	1
2078	3	Jug	2011-12-04	11:21:56	55.85	NA	1
2078	3	Jug	2011-12-04	11:24:51	1.81	NA	1
2078	3	Jug	2011-12-04	11:26:26	15.71	NA	1
2078	3	Jug	2011-12-04	14:17:00	83.74	red	1
2078	3	Jug	2011-12-04	20:51:36	2.1	NA	1
2078	3	Jug	2011-12-04	22:25:04	14.42	NA	1
2078	3	Jug	2011-12-05	06:07:44	10.06	NA	1
2078	3	Jug	2011-12-05	07:31:06	2.05	NA	1
2078	3	Jug	2011-12-05	07:32:40	25.57	NA	1
2078	3	Jug	2011-12-05	07:35:06	30.38	NA	1
2078	3	Jug	2011-12-05	07:36:41	17.12	NA	1
2078	3	Jug	2011-12-05	08:19:47	18.72	NA	1
2078	3	Jug	2011-12-05	08:26:53	8.71	NA	1
2123	4	Jug	2011-11-30	11:22:36	25.12	NA	1
2123	4	Jug	2011-11-30	11:42:24	107.71	NA	1
2123	4	Jug	2011-11-30	12:39:41	14.16	NA	1
2123	4	Jug	2011-11-30	12:42:04	47.95	white	1
2123	4	Jug	2011-11-30	12:44:29	40.14	NA	1
2123	4	Jug	2011-11-30	12:47:00	98.99	NA	1
2123	4	Jug	2011-11-30	13:55:59	4.96	NA	1
2123	4	Jug	2011-11-30	13:57:42	26.47	NA	1
2123	4	Jug	2011-11-30	14:27:38	7.06	NA	1
2123	4	Jug	2011-11-30	15:21:13	12.91	NA	1
2123	4	Jug	2011-11-30	16:12:51	7.66	NA	1
2123	4	Jug	2011-11-30	17:33:16	10.96	NA	1
2123	4	Jug	2011-11-30	17:59:56	6.66	NA	1
2123	4	Jug	2011-12-01	04:37:21	86.43	NA	1
2123	4	Jug	2011-12-01	05:37:57	79.88	NA	1
2123	4	Jug	2011-12-01	06:07:32	14.16	NA	1
2123	4	Jug	2011-12-01	06:14:06	178.23	white	1
2123	4	Jug	2011-12-01	07:35:27	5.9	NA	1
2123	4	Jug	2011-12-01	07:38:22	44.39	NA	1
2123	4	Jug	2011-12-01	07:59:19	32.99	NA	1
2123	4	Jug	2011-12-01	09:21:56	6.3	NA	1
2123	4	Jug	2011-12-01	09:23:31	20.82	NA	1
2123	4	Jug	2011-12-01	09:26:37	89.14	NA	1
2123	4	Jug	2011-12-01	10:52:15	5.95	NA	1
2123	4	Jug	2011-12-01	12:40:31	13.97	NA	1
2123	4	Jug	2011-12-01	13:12:41	6.05	NA	1
2123	4	Jug	2011-12-01	13:29:19	4.51	NA	1
2123	4	Jug	2011-12-01	14:48:45	8.6	red	1
2123	4	Jug	2011-12-01	15:23:28	3.36	NA	1
2123	4	Jug	2011-12-01	16:00:40	12.01	NA	1
2123	4	Jug	2011-12-01	19:11:10	4.1	NA	1
2123	4	Jug	2011-12-02	04:35:43	60.36	NA	1
2123	4	Jug	2011-12-02	04:38:05	36.53	NA	1
2123	4	Jug	2011-12-02	06:12:12	46.25	NA	1
2123	4	Jug	2011-12-02	06:19:30	44.59	NA	1
2123	4	Jug	2011-12-02	06:22:34	2.85	NA	1
2123	4	Jug	2011-12-02	06:33:06	83.23	NA	1
2123	4	Jug	2011-12-02	06:38:51	57.81	NA	1
2123	4	Jug	2011-12-02	06:48:32	13.11	NA	1
2123	4	Jug	2011-12-02	08:22:28	17.87	NA	1
2123	4	Jug	2011-12-02	08:30:39	14.51	NA	1
2123	4	Jug	2011-12-02	09:01:41	22.48	NA	1
2123	4	Jug	2011-12-02	09:23:35	19.52	NA	1
2123	4	Jug	2011-12-02	10:02:15	5.5	NA	1
2123	4	Jug	2011-12-02	10:04:06	77.88	NA	1
2123	4	Jug	2011-12-02	10:08:55	84.23	white	1
2123	4	Jug	2011-12-02	10:12:05	32.88	white	1
2123	4	Jug	2011-12-02	10:14:11	135.13	NA	1
2123	4	Jug	2011-12-02	10:31:59	11.21	NA	1
2123	4	Jug	2011-12-02	11:05:00	14.82	NA	1
2123	4	Jug	2011-12-02	11:56:18	16.86	NA	1
2123	4	Jug	2011-12-02	12:23:08	9.81	NA	1
2123	4	Jug	2011-12-02	12:36:52	11.92	NA	1
2123	4	Jug	2011-12-02	12:39:20	55.35	white	1
2123	4	Jug	2011-12-02	12:42:24	41.19	NA	1
2123	4	Jug	2011-12-02	13:33:07	10.86	NA	1
2123	4	Jug	2011-12-02	14:05:07	5.35	NA	1
2123	4	Jug	2011-12-02	14:19:43	5.11	white	1
2123	4	Jug	2011-12-02	14:20:50	10.96	NA	1
2123	4	Jug	2011-12-02	14:22:59	67.81	NA	1
2123	4	Jug	2011-12-02	14:26:41	45.7	white	1
2123	4	Jug	2011-12-02	14:30:34	116.31	white	1
2123	4	Jug	2011-12-02	14:37:03	29.08	NA	1
2123	4	Jug	2011-12-02	14:40:57	17.56	NA	1
2123	4	Jug	2011-12-02	14:46:51	4.66	NA	1
2123	4	Jug	2011-12-02	14:51:26	22.67	NA	1
2123	4	Jug	2011-12-02	14:53:28	50.5	NA	1
2123	4	Jug	2011-12-02	15:03:27	68.72	NA	1
2123	4	Jug	2011-12-02	16:06:21	30.07	NA	1
2123	4	Jug	2011-12-02	16:13:26	14.72	NA	1
2123	4	Jug	2011-12-02	16:46:59	15.11	NA	1
2123	4	Jug	2011-12-02	17:21:09	16.47	NA	1
2123	4	Jug	2011-12-02	17:45:03	12.81	NA	1
2123	4	Jug	2011-12-02	18:05:07	23.47	NA	1
2123	4	Jug	2011-12-02	18:26:45	6.11	NA	1
2123	4	Jug	2011-12-03	06:10:13	122.72	NA	1
2123	4	Jug	2011-12-03	06:47:00	13.46	NA	1
2123	4	Jug	2011-12-03	07:17:14	64.07	NA	1
2123	4	Jug	2011-12-03	07:27:47	4.15	NA	1
2123	4	Jug	2011-12-03	07:43:19	21.52	NA	1
2123	4	Jug	2011-12-03	08:28:14	6.96	NA	1
2123	4	Jug	2011-12-03	08:38:37	18.62	NA	1
2123	4	Jug	2011-12-03	08:42:53	33.78	NA	1
2123	4	Jug	2011-12-03	08:47:44	41.44	NA	1
2123	4	Jug	2011-12-03	08:50:41	94.29	red	1
2123	4	Jug	2011-12-03	08:54:58	45.9	NA	1
2123	4	Jug	2011-12-03	10:05:33	35.73	NA	1
2123	4	Jug	2011-12-03	10:45:26	66.57	white	1
2123	4	Jug	2011-12-03	10:49:49	58.26	NA	1
2123	4	Jug	2011-12-03	10:51:55	24.92	NA	1
2123	4	Jug	2011-12-03	10:58:15	9.71	NA	1
2123	4	Jug	2011-12-03	11:02:02	91.39	NA	1
2123	4	Jug	2011-12-03	11:09:06	56.51	NA	1
2123	4	Jug	2011-12-03	11:13:22	163.86	NA	1
2123	4	Jug	2011-12-03	11:18:45	86.23	NA	1
2123	4	Jug	2011-12-03	11:23:12	200.44	NA	1
2123	4	Jug	2011-12-03	11:30:17	163.21	NA	1
2123	4	Jug	2011-12-03	11:35:56	19.52	NA	1
2123	4	Jug	2011-12-03	11:38:43	395.53	white	1
2123	4	Jug	2011-12-03	11:54:59	6.9	NA	1
2123	4	Jug	2011-12-03	12:26:56	12.31	NA	1
2123	4	Jug	2011-12-03	12:53:50	9.01	NA	1
2123	4	Jug	2011-12-03	13:26:19	16.52	NA	1
2123	4	Jug	2011-12-03	15:37:39	16.66	NA	1
2123	4	Jug	2011-12-03	16:39:41	13.32	NA	1
2123	4	Jug	2011-12-03	17:13:56	18.01	NA	1
2123	4	Jug	2011-12-03	17:57:59	6.66	NA	1
2123	4	Jug	2011-12-04	07:44:42	74.77	white	1
1908	5	Jug	2011-11-30	13:13:25	1.66	red	1
1908	5	Jug	2011-11-30	15:40:11	33.68	red	1
1908	5	Jug	2011-11-30	16:23:34	18.47	red	1
1908	5	Jug	2011-11-30	19:52:56	21.47	NA	1
1908	5	Jug	2011-11-30	20:18:41	8.81	NA	1
1908	5	Jug	2011-11-30	20:20:01	10.66	NA	1
1908	5	Jug	2011-11-30	23:25:10	29.47	NA	1
1908	5	Jug	2011-12-01	01:24:51	1.06	NA	1
1908	5	Jug	2011-12-01	06:13:26	7.75	NA	1
1908	5	Jug	2011-12-01	06:53:04	7.36	NA	1
1908	5	Jug	2011-12-01	06:59:02	25.67	NA	1
1908	5	Jug	2011-12-01	07:22:46	40.19	NA	1
1908	5	Jug	2011-12-01	07:31:39	18.27	NA	1
1908	5	Jug	2011-12-01	07:34:29	49.8	NA	1
1908	5	Jug	2011-12-01	08:03:35	89.94	NA	1
1908	5	Jug	2011-12-01	09:07:48	12.41	NA	1
1908	5	Jug	2011-12-01	10:51:58	34.53	red	1
1908	5	Jug	2011-12-01	11:19:11	55.57	NA	1
1908	5	Jug	2011-12-01	14:22:24	66.81	NA	1
1908	5	Jug	2011-12-01	17:39:14	18.97	red	1
1908	5	Jug	2011-12-01	19:43:52	31.18	red	1
1908	5	Jug	2011-12-02	06:51:03	46.75	red	1
1908	5	Jug	2011-12-02	07:37:41	16.61	NA	1
1908	5	Jug	2011-12-02	07:47:12	39.14	white	1
1908	5	Jug	2011-12-02	09:31:32	44.79	NA	1
1908	5	Jug	2011-12-02	09:41:35	15.67	NA	1
1908	5	Jug	2011-12-02	10:40:04	9.06	NA	1
1908	5	Jug	2011-12-02	13:47:17	2.75	NA	1
1908	5	Jug	2011-12-02	14:41:23	44.79	red	1
1908	5	Jug	2011-12-02	15:13:50	8.51	NA	1
1908	5	Jug	2011-12-02	18:11:12	8.31	NA	1
1908	5	Jug	2011-12-02	20:31:43	11.91	NA	1
1908	5	Jug	2011-12-02	20:59:50	16.82	NA	1
1908	5	Jug	2011-12-03	05:12:31	4.95	NA	1
1908	5	Jug	2011-12-03	05:14:25	9.86	red	1
1908	5	Jug	2011-12-03	08:04:50	63.81	NA	1
1908	5	Jug	2011-12-03	10:24:03	31.33	red	1
1908	5	Jug	2011-12-03	11:59:56	14.17	NA	1
1908	5	Jug	2011-12-03	12:23:45	6.4	NA	1
1908	5	Jug	2011-12-03	14:09:04	13.77	NA	1
1908	5	Jug	2011-12-03	14:57:51	17.81	NA	1
1908	5	Jug	2011-12-04	07:12:18	6.41	NA	1
1908	5	Jug	2011-12-04	07:28:23	26.98	NA	1
1908	5	Jug	2011-12-04	08:33:37	64.81	red	1
1908	5	Jug	2011-12-04	09:38:26	9.51	NA	1
1908	5	Jug	2011-12-04	10:55:13	22.22	NA	1
1908	5	Jug	2011-12-04	16:30:05	27.43	NA	1
1908	5	Jug	2011-12-04	17:46:33	1.7	white	1
1908	5	Jug	2011-12-04	21:07:36	1.05	NA	1
1908	5	Jug	2011-12-05	06:49:40	12.11	NA	1
1908	5	Jug	2011-12-05	06:51:59	4.65	NA	1
1908	5	Jug	2011-12-05	07:00:41	25.78	NA	1
1908	5	Jug	2011-12-05	07:24:32	13.51	NA	1
1908	5	Jug	2011-12-05	07:42:14	32.53	NA	1
1908	5	Jug	2011-12-05	07:44:15	9.46	NA	1
1908	5	Jug	2011-12-05	07:53:55	78.53	NA	1
1908	5	Jug	2011-12-05	08:24:48	29.18	NA	1
1908	5	Jug	2011-12-05	08:28:18	5.05	NA	1
1908	5	Jug	2011-12-05	08:34:00	39.34	NA	1
1908	5	Jug	2011-12-05	08:44:50	7.46	NA	1
1908	5	Jug	2011-12-05	08:46:24	17.62	NA	1
2132	6	Jug	2011-11-30	11:47:22	4.2	NA	1
2132	6	Jug	2011-11-30	11:54:24	6.06	NA	1
2132	6	Jug	2011-11-30	11:56:42	2.75	NA	1
2132	6	Jug	2011-11-30	11:59:10	2.8	NA	1
2132	6	Jug	2011-11-30	13:04:08	14.52	NA	1
2132	6	Jug	2011-11-30	14:00:17	14.96	NA	1
2132	6	Jug	2011-11-30	14:31:23	20.77	NA	1
2132	6	Jug	2011-11-30	14:56:17	6.56	NA	1
2132	6	Jug	2011-11-30	14:57:44	39.08	NA	1
2132	6	Jug	2011-11-30	15:21:23	1.46	NA	1
2132	6	Jug	2011-11-30	15:51:08	76.37	NA	1
2132	6	Jug	2011-11-30	18:50:18	16.87	NA	1
2132	6	Jug	2011-11-30	19:44:25	4.26	NA	1
2132	6	Jug	2011-11-30	20:05:21	2	NA	1
2132	6	Jug	2011-11-30	21:40:45	42.94	red	1
2132	6	Jug	2011-12-01	06:59:08	13.51	NA	1
2132	6	Jug	2011-12-01	07:02:14	12.52	NA	1
2132	6	Jug	2011-12-01	08:09:59	2.65	NA	1
2132	6	Jug	2011-12-01	20:31:42	3.65	NA	1
2132	6	Jug	2011-12-01	21:28:01	23.12	NA	1
2132	6	Jug	2011-12-01	21:35:35	13.82	NA	1
2132	6	Jug	2011-12-01	21:36:51	23.47	NA	1
2132	6	Jug	2011-12-01	21:38:17	11.21	NA	1
2132	6	Jug	2011-12-02	06:14:38	5.71	NA	1
2132	6	Jug	2011-12-02	06:54:43	5.85	NA	1
2132	6	Jug	2011-12-02	07:01:43	13.67	NA	1
2132	6	Jug	2011-12-02	07:05:37	13.06	NA	1
2132	6	Jug	2011-12-02	07:15:05	12.41	NA	1
2132	6	Jug	2011-12-02	07:22:37	12.91	NA	1
2132	6	Jug	2011-12-02	07:37:18	1.1	NA	1
2132	6	Jug	2011-12-02	07:59:21	1.91	red	1
2132	6	Jug	2011-12-02	08:01:03	20.82	red	1
2132	6	Jug	2011-12-02	08:24:08	7.55	NA	1
2132	6	Jug	2011-12-02	08:31:36	28.33	NA	1
2132	6	Jug	2011-12-02	08:44:05	6.56	NA	1
2132	6	Jug	2011-12-02	09:02:20	11.71	NA	1
2132	6	Jug	2011-12-02	09:26:15	5.95	NA	1
2132	6	Jug	2011-12-02	09:32:51	11.81	NA	1
2132	6	Jug	2011-12-02	09:38:14	7.51	NA	1
2132	6	Jug	2011-12-02	09:40:13	11.76	NA	1
2132	6	Jug	2011-12-02	09:42:47	9.66	NA	1
2132	6	Jug	2011-12-02	09:45:01	17.02	NA	1
2132	6	Jug	2011-12-02	13:03:32	16.36	NA	1
2132	6	Jug	2011-12-02	15:27:58	2.51	white	1
2132	6	Jug	2011-12-02	16:41:47	2.15	NA	1
2132	6	Jug	2011-12-02	17:55:12	1.2	NA	1
2132	6	Jug	2011-12-02	17:56:18	2.85	NA	1
2132	6	Jug	2011-12-02	18:46:11	2.8	NA	1
2132	6	Jug	2011-12-02	18:47:16	44.7	NA	1
2132	6	Jug	2011-12-02	19:20:25	17.42	NA	1
2132	6	Jug	2011-12-02	20:45:34	19.81	NA	1
2132	6	Jug	2011-12-02	21:08:53	8.51	NA	1
2132	6	Jug	2011-12-02	21:34:05	30.43	white	1
2132	6	Jug	2011-12-03	05:45:58	77.13	NA	1
2132	6	Jug	2011-12-03	05:48:30	11.46	NA	1
2132	6	Jug	2011-12-03	05:50:10	5.1	red	1
2132	6	Jug	2011-12-03	05:54:23	7.46	NA	1
2132	6	Jug	2011-12-03	05:56:14	76.93	NA	1
2132	6	Jug	2011-12-03	06:00:12	21.27	white	1
2132	6	Jug	2011-12-03	06:05:54	104.2	white	1
2132	6	Jug	2011-12-03	07:39:56	22.07	red	1
2132	6	Jug	2011-12-03	07:57:28	8.61	NA	1
2132	6	Jug	2011-12-03	08:05:36	15.46	NA	1
2132	6	Jug	2011-12-03	08:16:40	4.91	NA	1
2132	6	Jug	2011-12-03	10:23:23	11.06	NA	1
2132	6	Jug	2011-12-03	10:27:58	64.46	NA	1
2132	6	Jug	2011-12-03	10:38:00	14.86	NA	1
2132	6	Jug	2011-12-03	10:45:55	5.96	NA	1
2132	6	Jug	2011-12-03	12:22:37	19.57	NA	1
2132	6	Jug	2011-12-03	12:41:23	6.35	NA	1
2132	6	Jug	2011-12-03	12:49:26	8.86	NA	1
2132	6	Jug	2011-12-03	12:50:36	31.38	NA	1
2132	6	Jug	2011-12-03	13:37:36	7.86	NA	1
2132	6	Jug	2011-12-03	14:19:20	32.83	NA	1
2132	6	Jug	2011-12-03	14:24:16	5.36	NA	1
2132	6	Jug	2011-12-03	15:21:19	10.81	NA	1
2132	6	Jug	2011-12-03	15:35:53	41.59	NA	1
2132	6	Jug	2011-12-03	20:04:58	6.56	NA	1
2132	6	Jug	2011-12-03	20:19:02	3.1	NA	1
2132	6	Jug	2011-12-04	06:03:09	1.1	NA	1
2132	6	Jug	2011-12-04	08:14:30	2.6	NA	1
2132	6	Jug	2011-12-04	20:56:27	3.4	NA	1
2132	6	Jug	2011-12-05	08:26:44	42.85	NA	1
2132	6	Jug	2011-12-05	08:35:30	22.87	NA	1
2132	6	Jug	2011-12-05	09:26:04	12.21	red	1
2132	6	Jug	2011-12-05	09:32:51	44.94	NA	1
2173	7	Jug	2011-12-02	15:50:30	6.45	NA	2
2173	7	Jug	2011-12-03	05:00:57	12.12	NA	2
2173	7	Jug	2011-12-03	05:06:33	6.2	NA	2
2173	7	Jug	2011-12-03	05:42:13	5.06	NA	2
2173	7	Jug	2011-12-03	05:46:51	74.17	red	2
2173	7	Jug	2011-12-03	06:05:57	20.57	NA	2
2173	7	Jug	2011-12-03	06:07:47	31.18	NA	2
2173	7	Jug	2011-12-03	06:12:22	31.03	NA	2
2173	7	Jug	2011-12-03	08:35:05	9.51	NA	2
2173	7	Jug	2011-12-03	09:29:50	48.6	red	2
2173	7	Jug	2011-12-03	09:32:51	17.16	NA	2
2173	7	Jug	2011-12-03	09:36:26	49.3	NA	2
2173	7	Jug	2011-12-03	09:39:27	91.14	NA	2
2173	7	Jug	2011-12-03	09:42:37	20.17	white	2
2173	7	Jug	2011-12-03	13:34:01	40.14	NA	2
2173	7	Jug	2011-12-04	05:13:02	2.85	NA	2
2173	7	Jug	2011-12-04	05:15:46	66.37	NA	2
2173	7	Jug	2011-12-04	05:27:10	46.19	NA	2
2173	7	Jug	2011-12-04	05:41:03	1.2	NA	2
2173	7	Jug	2011-12-04	05:45:28	22.72	red	2
2173	7	Jug	2011-12-04	05:51:19	9.86	NA	2
2173	7	Jug	2011-12-04	05:55:02	69.37	white	2
2173	7	Jug	2011-12-04	07:36:26	7.96	NA	2
2173	7	Jug	2011-12-04	13:06:11	26.02	NA	2
2173	7	Jug	2011-12-04	14:08:18	40.14	NA	2
2173	7	Jug	2011-12-04	14:35:57	6.61	NA	2
2173	7	Jug	2011-12-04	14:38:00	18.77	NA	2
2173	7	Jug	2011-12-04	17:15:52	9.51	NA	2
2173	7	Jug	2011-12-04	17:17:30	123.32	NA	2
2173	7	Jug	2011-12-04	18:35:58	23.12	red	2
2173	7	Jug	2011-12-04	22:24:18	4.75	NA	2
2173	7	Jug	2011-12-04	22:27:09	33.04	NA	2
2173	7	Jug	2011-12-05	04:34:23	2.35	NA	2
2173	7	Jug	2011-12-05	04:35:32	22.67	NA	2
2173	7	Jug	2011-12-05	04:37:44	48.6	NA	2
2173	7	Jug	2011-12-05	04:46:14	1.95	NA	2
2173	7	Jug	2011-12-05	05:03:15	34.83	red	2
2173	7	Jug	2011-12-05	05:25:05	57.86	NA	2
2173	7	Jug	2011-12-05	05:37:45	30.33	NA	2
2173	7	Jug	2011-12-05	05:41:00	43.09	NA	2
2173	7	Jug	2011-12-05	05:56:49	21.02	NA	2
2173	7	Jug	2011-12-05	06:11:00	2.6	NA	2
2173	7	Jug	2011-12-05	06:13:59	19.02	red	2
2173	7	Jug	2011-12-05	06:21:35	66.77	red	2
2173	7	Jug	2011-12-05	06:25:29	19.27	red	2
2173	7	Jug	2011-12-05	06:27:12	45.39	NA	2
2173	7	Jug	2011-12-05	06:36:29	6.96	NA	2
2173	7	Jug	2011-12-05	06:38:55	25.37	NA	2
2173	7	Jug	2011-12-05	06:43:24	24.17	NA	2
2173	7	Jug	2011-12-05	06:58:07	11.92	NA	2
2173	7	Jug	2011-12-05	07:22:01	3.4	NA	2
2173	7	Jug	2011-12-05	07:23:11	24.42	NA	2
2173	7	Jug	2011-12-05	07:26:24	7.81	NA	2
2173	7	Jug	2011-12-05	08:15:56	27.33	NA	2
2173	7	Jug	2011-12-05	08:23:24	21.72	NA	2
2173	7	Jug	2011-12-05	09:15:27	3.1	NA	2
2173	7	Jug	2011-12-05	09:18:08	186.13	red	2
2173	7	Jug	2011-12-05	10:05:52	36.49	NA	2
2173	7	Jug	2011-12-05	10:07:35	24.47	NA	2
2173	7	Jug	2011-12-05	11:35:07	8.01	NA	2
2173	7	Jug	2011-12-05	11:37:34	14.46	NA	2
2173	7	Jug	2011-12-05	13:06:53	14.17	NA	2
2173	7	Jug	2011-12-05	13:10:00	34.88	white	2
2173	7	Jug	2011-12-05	13:11:40	14.37	NA	2
2173	7	Jug	2011-12-05	21:24:15	26.52	NA	2
2173	7	Jug	2011-12-05	21:47:32	45.29	NA	2
2173	7	Jug	2011-12-05	21:53:20	11.12	NA	2
2173	7	Jug	2011-12-06	05:18:40	9.3	NA	2
2173	7	Jug	2011-12-06	05:43:22	14.02	NA	2
2173	7	Jug	2011-12-06	05:54:53	53.15	red	2
2173	7	Jug	2011-12-06	06:01:44	55.4	red	2
2173	7	Jug	2011-12-06	06:12:02	70.77	NA	2
2173	7	Jug	2011-12-06	06:15:24	32.83	NA	2
2173	7	Jug	2011-12-06	06:50:15	1.16	NA	2
2173	7	Jug	2011-12-06	06:52:09	18.41	NA	2
2173	7	Jug	2011-12-06	07:20:39	91.39	NA	2
2173	7	Jug	2011-12-06	07:46:37	32.68	red	2
2173	7	Jug	2011-12-06	08:37:19	43.4	NA	2
2173	7	Jug	2011-12-06	15:22:57	19.72	NA	2
2173	7	Jug	2011-12-06	17:19:18	6.45	NA	2
2173	7	Jug	2011-12-06	17:21:39	8.01	NA	2
2173	7	Jug	2011-12-06	19:18:51	10.46	NA	2
2173	7	Jug	2011-12-07	05:00:19	1.9	NA	2
2173	7	Jug	2011-12-07	05:01:52	17.27	NA	2
2173	7	Jug	2011-12-07	06:01:33	21.57	NA	2
2173	7	Jug	2011-12-07	06:06:38	1.2	NA	2
2173	7	Jug	2011-12-07	06:09:18	57.66	red	2
2173	7	Jug	2011-12-07	06:16:17	39.18	NA	2
2173	7	Jug	2011-12-07	08:07:36	42.09	red	2
2173	7	Jug	2011-12-07	09:37:52	25.93	NA	2
2173	7	Jug	2011-12-07	09:42:16	63.51	NA	2
2173	7	Jug	2011-12-07	09:50:48	135.23	NA	2
1942	8	Jug	2011-12-02	11:28:22	1.55	NA	1
1942	8	Jug	2011-12-02	11:30:11	3.51	NA	1
1942	8	Jug	2011-12-02	11:32:52	75.97	red	1
1942	8	Jug	2011-12-02	11:54:38	17.87	NA	1
1942	8	Jug	2011-12-02	12:17:20	32.03	NA	1
1942	8	Jug	2011-12-02	12:21:48	23.72	NA	1
1942	8	Jug	2011-12-02	12:38:57	37.74	NA	1
1942	8	Jug	2011-12-02	12:46:15	13.46	NA	1
1942	8	Jug	2011-12-02	12:54:22	13.41	NA	1
1942	8	Jug	2011-12-02	13:57:35	11.37	NA	1
1942	8	Jug	2011-12-02	15:45:38	12.36	NA	1
1942	8	Jug	2011-12-02	16:40:42	69.41	white	1
1942	8	Jug	2011-12-02	16:51:28	27.18	NA	1
1942	8	Jug	2011-12-02	17:03:47	15.42	NA	1
1942	8	Jug	2011-12-02	17:05:53	8.71	NA	1
1942	8	Jug	2011-12-02	17:10:13	2.71	NA	1
1942	8	Jug	2011-12-02	17:11:43	59.75	NA	1
1942	8	Jug	2011-12-02	17:27:02	21.27	NA	1
1942	8	Jug	2011-12-02	17:33:55	3.11	NA	1
1942	8	Jug	2011-12-02	17:45:14	21.27	NA	1
1942	8	Jug	2011-12-02	17:46:41	11.36	NA	1
1942	8	Jug	2011-12-02	17:48:29	10.46	NA	1
1942	8	Jug	2011-12-02	17:56:16	162.66	white	1
1942	8	Jug	2011-12-02	19:53:36	21.42	NA	1
1942	8	Jug	2011-12-02	21:42:12	82.33	red	1
1942	8	Jug	2011-12-02	21:45:35	33.93	white	1
1942	8	Jug	2011-12-02	21:47:19	53.15	NA	1
1942	8	Jug	2011-12-02	23:24:26	45.55	NA	1
1942	8	Jug	2011-12-02	23:26:33	4.25	NA	1
1942	8	Jug	2011-12-02	23:30:28	2.15	NA	1
1942	8	Jug	2011-12-03	06:34:45	67.07	white	1
1942	8	Jug	2011-12-03	06:44:45	21.57	NA	1
1942	8	Jug	2011-12-03	06:50:29	14.51	NA	1
1942	8	Jug	2011-12-03	06:52:13	1.35	NA	1
1942	8	Jug	2011-12-03	06:57:34	26.78	NA	1
1942	8	Jug	2011-12-03	08:23:07	10.11	NA	1
1942	8	Jug	2011-12-03	08:30:41	2	NA	1
1942	8	Jug	2011-12-03	08:33:22	60.71	red	1
1942	8	Jug	2011-12-03	08:45:25	3.7	NA	1
1942	8	Jug	2011-12-03	08:53:41	4.96	NA	1
1942	8	Jug	2011-12-03	09:01:53	46.99	white	1
1942	8	Jug	2011-12-03	09:06:11	22.02	NA	1
1942	8	Jug	2011-12-03	09:09:29	1.05	NA	1
1942	8	Jug	2011-12-03	09:10:31	45.85	NA	1
1942	8	Jug	2011-12-03	09:12:48	22.12	NA	1
1942	8	Jug	2011-12-03	09:16:33	44.94	NA	1
1942	8	Jug	2011-12-03	09:26:44	66.62	NA	1
1942	8	Jug	2011-12-03	10:48:16	1.1	NA	1
1942	8	Jug	2011-12-03	11:31:40	6.41	NA	1
1942	8	Jug	2011-12-03	12:15:23	17.06	NA	1
1942	8	Jug	2011-12-03	12:23:00	18.02	NA	1
1942	8	Jug	2011-12-03	12:32:54	7.11	NA	1
1942	8	Jug	2011-12-03	12:36:59	4.45	NA	1
1942	8	Jug	2011-12-03	12:42:16	2.05	NA	1
1942	8	Jug	2011-12-03	14:02:11	37.94	NA	1
1942	8	Jug	2011-12-03	15:29:29	7.96	NA	1
1942	8	Jug	2011-12-03	15:38:19	25.27	NA	1
1942	8	Jug	2011-12-03	16:50:54	2.05	NA	1
1942	8	Jug	2011-12-03	16:52:03	15.22	NA	1
1942	8	Jug	2011-12-03	16:53:54	17.07	white	1
1942	8	Jug	2011-12-03	16:56:52	13.41	NA	1
1942	8	Jug	2011-12-03	17:02:39	23.97	NA	1
1942	8	Jug	2011-12-03	17:05:59	4.46	white	1
1942	8	Jug	2011-12-03	17:09:48	11.86	NA	1
1942	8	Jug	2011-12-03	17:11:50	5.1	NA	1
1942	8	Jug	2011-12-03	17:13:21	71.72	NA	1
1942	8	Jug	2011-12-03	17:20:20	5.86	NA	1
1942	8	Jug	2011-12-03	17:22:39	1.3	NA	1
1942	8	Jug	2011-12-03	18:12:58	9.06	NA	1
1942	8	Jug	2011-12-03	18:41:22	14.66	NA	1
1942	8	Jug	2011-12-03	18:43:30	13.91	NA	1
1942	8	Jug	2011-12-03	18:48:15	63.87	NA	1
1942	8	Jug	2011-12-03	21:06:52	43.24	NA	1
1942	8	Jug	2011-12-04	06:44:06	9.81	NA	1
1942	8	Jug	2011-12-04	08:53:56	43.64	red	1
1942	8	Jug	2011-12-04	09:35:33	4.36	NA	1
1942	8	Jug	2011-12-04	09:53:03	32.94	NA	1
1942	8	Jug	2011-12-04	09:56:55	32.18	NA	1
1942	8	Jug	2011-12-04	10:05:23	8.21	NA	1
1942	8	Jug	2011-12-04	10:45:19	12.56	NA	1
1942	8	Jug	2011-12-04	10:46:37	3	NA	1
1942	8	Jug	2011-12-04	11:24:00	12.21	NA	1
1942	8	Jug	2011-12-04	11:33:49	64.67	NA	1
1942	8	Jug	2011-12-04	11:38:02	5.45	NA	1
1942	8	Jug	2011-12-04	11:39:26	25.07	NA	1
1942	8	Jug	2011-12-04	11:40:52	88.04	white	1
1942	8	Jug	2011-12-04	11:45:07	59.56	NA	1
1942	8	Jug	2011-12-04	11:52:14	6.35	NA	1
1942	8	Jug	2011-12-04	12:40:13	6.91	NA	1
1942	8	Jug	2011-12-04	12:42:32	17.87	NA	1
1942	8	Jug	2011-12-04	12:44:42	27.03	NA	1
1942	8	Jug	2011-12-04	12:50:16	77.18	NA	1
1942	8	Jug	2011-12-04	12:53:14	26.73	NA	1
1942	8	Jug	2011-12-04	13:11:54	2.85	NA	1
1942	8	Jug	2011-12-04	16:01:56	6.91	NA	1
1942	8	Jug	2011-12-04	16:09:43	50.7	NA	1
1942	8	Jug	2011-12-04	16:13:24	3.45	NA	1
1942	8	Jug	2011-12-04	16:15:01	8.71	NA	1
1942	8	Jug	2011-12-04	16:18:26	16.06	NA	1
1942	8	Jug	2011-12-04	16:20:21	93.34	NA	1
1942	8	Jug	2011-12-04	16:24:31	106.46	NA	1
1942	8	Jug	2011-12-04	19:36:02	16.71	white	1
1942	8	Jug	2011-12-04	19:38:15	130.53	white	1
1942	8	Jug	2011-12-04	22:16:17	8.81	NA	1
1942	8	Jug	2011-12-04	22:19:11	22.32	NA	1
1942	8	Jug	2011-12-04	22:51:24	32.58	NA	1
1942	8	Jug	2011-12-05	08:12:46	31.33	NA	1
1942	8	Jug	2011-12-05	08:16:09	1.75	NA	1
1942	8	Jug	2011-12-05	08:22:02	6.41	NA	1
1942	8	Jug	2011-12-05	08:48:12	11.41	NA	1
1942	8	Jug	2011-12-05	08:58:54	13.87	red	1
1942	8	Jug	2011-12-05	09:44:51	18.52	NA	1
1942	8	Jug	2011-12-05	09:48:14	15.32	NA	1
1942	8	Jug	2011-12-05	09:53:37	10.76	red	1
1942	8	Jug	2011-12-05	11:06:15	8.51	NA	1
1942	8	Jug	2011-12-05	11:40:12	12.61	NA	1
1942	8	Jug	2011-12-05	11:54:04	4.1	NA	1
1942	8	Jug	2011-12-05	11:55:08	12.36	NA	1
1942	8	Jug	2011-12-05	13:11:34	49	white	1
1942	8	Jug	2011-12-05	15:41:09	16.67	NA	1
2170	9	Jug	2011-12-02	12:40:36	16.12	NA	2
2170	9	Jug	2011-12-02	12:44:43	29.48	NA	2
2170	9	Jug	2011-12-02	13:29:20	34.13	NA	2
2170	9	Jug	2011-12-02	13:34:55	19.92	NA	2
2170	9	Jug	2011-12-02	13:36:33	9.36	NA	2
2170	9	Jug	2011-12-02	13:39:19	5.45	NA	2
2170	9	Jug	2011-12-02	13:54:15	28.53	NA	2
2170	9	Jug	2011-12-02	13:57:33	6.31	NA	2
2170	9	Jug	2011-12-02	14:00:09	4.4	NA	2
2170	9	Jug	2011-12-02	14:03:42	32.93	NA	2
2170	9	Jug	2011-12-02	14:09:58	49.35	NA	2
2170	9	Jug	2011-12-02	14:14:13	8.66	NA	2
2170	9	Jug	2011-12-02	14:16:53	69.52	NA	2
2170	9	Jug	2011-12-02	14:21:12	91.89	white	2
2170	9	Jug	2011-12-02	14:28:53	185.94	NA	2
2170	9	Jug	2011-12-02	14:41:27	20.42	NA	2
2170	9	Jug	2011-12-02	15:51:25	5.5	NA	2
2170	9	Jug	2011-12-02	16:48:17	49	white	2
2170	9	Jug	2011-12-02	16:52:57	4.95	NA	2
2170	9	Jug	2011-12-02	16:54:38	74.28	NA	2
2170	9	Jug	2011-12-02	16:57:56	65.76	white	2
2170	9	Jug	2011-12-02	17:00:59	246.89	white	2
2170	9	Jug	2011-12-02	17:11:44	67.17	white	2
2170	9	Jug	2011-12-03	13:52:49	22.27	NA	2
2170	9	Jug	2011-12-03	14:02:02	1.45	NA	2
2170	9	Jug	2011-12-03	14:03:54	24.87	NA	2
2170	9	Jug	2011-12-03	14:06:16	21.92	white	2
2170	9	Jug	2011-12-03	14:09:08	102.75	NA	2
2170	9	Jug	2011-12-03	14:12:38	46.3	white	2
2170	9	Jug	2011-12-03	14:15:17	74.77	NA	2
2170	9	Jug	2011-12-03	14:19:04	20.72	NA	2
2170	9	Jug	2011-12-03	15:26:55	19.62	NA	2
2170	9	Jug	2011-12-03	15:31:19	16.62	white	2
2170	9	Jug	2011-12-03	15:39:37	19.31	NA	2
2170	9	Jug	2011-12-03	17:59:14	37.89	NA	2
2170	9	Jug	2011-12-03	20:42:54	28.28	NA	2
2170	9	Jug	2011-12-03	20:44:41	18.17	NA	2
2170	9	Jug	2011-12-04	06:21:05	74.57	NA	2
2170	9	Jug	2011-12-05	06:40:08	40.29	NA	2
2170	9	Jug	2011-12-05	06:50:06	37.63	red	2
2170	9	Jug	2011-12-05	09:46:54	18.62	white	2
2170	9	Jug	2011-12-05	16:20:37	24.32	NA	2
2170	9	Jug	2011-12-05	16:26:49	61.11	white	2
2170	9	Jug	2011-12-05	16:44:47	23.38	NA	2
2170	9	Jug	2011-12-05	17:20:17	6.7	NA	2
2170	9	Jug	2011-12-05	17:47:20	2.41	NA	2
2170	9	Jug	2011-12-05	17:53:05	41.05	white	2
2170	9	Jug	2011-12-05	17:56:13	14.42	NA	2
2170	9	Jug	2011-12-05	17:58:39	38.09	NA	2
2170	9	Jug	2011-12-05	18:01:08	46.34	white	2
2170	9	Jug	2011-12-06	09:46:23	18.92	white	2
2170	9	Jug	2011-12-06	09:48:07	36.14	white	2
2170	9	Jug	2011-12-06	11:51:35	11.97	NA	2
2170	9	Jug	2011-12-06	14:59:04	45.84	white	2
2170	9	Jug	2011-12-06	15:04:42	7.86	NA	2
2170	9	Jug	2011-12-06	15:49:47	15.91	NA	2
2170	9	Jug	2011-12-06	16:06:36	1.2	red	2
2170	9	Jug	2011-12-06	17:14:15	24.73	NA	2
2170	9	Jug	2011-12-06	17:19:10	24.47	white	2
2170	9	Jug	2011-12-06	17:21:58	155.35	white	2
2170	9	Jug	2011-12-06	17:31:04	30.98	white	2
2170	9	Jug	2011-12-06	21:09:33	5.71	NA	2
2170	9	Jug	2011-12-07	06:17:06	24.17	NA	2
1973	10	Jug	2011-12-02	11:28:25	20.57	NA	1
1973	10	Jug	2011-12-02	12:31:47	6.46	NA	1
1973	10	Jug	2011-12-02	13:15:57	25.28	NA	1
1973	10	Jug	2011-12-02	14:54:45	11.81	NA	1
1973	10	Jug	2011-12-02	18:30:02	6.86	NA	1
1973	10	Jug	2011-12-02	21:34:07	55.6	NA	1
1973	10	Jug	2011-12-02	21:38:12	28.78	NA	1
1973	10	Jug	2011-12-03	07:31:50	85.93	white	1
1973	10	Jug	2011-12-03	07:35:17	103.3	NA	1
1973	10	Jug	2011-12-03	07:46:45	8.66	NA	1
1973	10	Jug	2011-12-03	07:48:57	27.48	NA	1
1973	10	Jug	2011-12-03	07:53:49	47.89	NA	1
1973	10	Jug	2011-12-03	07:57:30	33.49	red	1
1973	10	Jug	2011-12-03	09:28:13	39.68	white	1
1973	10	Jug	2011-12-03	09:32:33	56.41	NA	1
1973	10	Jug	2011-12-03	09:34:34	36.63	NA	1
1973	10	Jug	2011-12-03	09:42:11	50.2	NA	1
1973	10	Jug	2011-12-03	10:07:18	49.85	NA	1
1973	10	Jug	2011-12-03	10:11:13	22.07	NA	1
1973	10	Jug	2011-12-03	10:53:13	14.67	NA	1
1973	10	Jug	2011-12-03	13:21:20	20.02	NA	1
1973	10	Jug	2011-12-03	13:39:09	41.44	NA	1
1973	10	Jug	2011-12-03	14:27:32	26.52	NA	1
1973	10	Jug	2011-12-03	15:00:09	18.92	NA	1
1973	10	Jug	2011-12-03	16:25:44	6.51	NA	1
1973	10	Jug	2011-12-03	17:08:12	13.66	NA	1
1973	10	Jug	2011-12-03	18:31:09	14.86	NA	1
1973	10	Jug	2011-12-03	18:48:48	60.31	white	1
1973	10	Jug	2011-12-03	18:52:00	7.11	NA	1
1973	10	Jug	2011-12-03	18:54:07	84.98	red	1
1973	10	Jug	2011-12-03	19:16:24	33.13	NA	1
1973	10	Jug	2011-12-03	19:20:20	84.43	NA	1
1973	10	Jug	2011-12-03	20:05:11	2.01	NA	1
1973	10	Jug	2011-12-03	21:34:23	243.38	white	1
1973	10	Jug	2011-12-03	21:43:57	57.81	NA	1
1973	10	Jug	2011-12-03	22:03:24	15.41	NA	1
1973	10	Jug	2011-12-03	22:15:12	3.21	NA	1
1973	10	Jug	2011-12-04	00:11:12	49.79	NA	1
1973	10	Jug	2011-12-04	00:15:44	15.52	NA	1
1973	10	Jug	2011-12-04	05:02:10	52.25	NA	1
1973	10	Jug	2011-12-04	05:05:53	35.53	NA	1
1973	10	Jug	2011-12-04	06:11:44	10.31	NA	1
1973	10	Jug	2011-12-04	06:19:51	2.66	NA	1
1973	10	Jug	2011-12-04	06:21:22	7.9	NA	1
1973	10	Jug	2011-12-04	07:26:52	27.33	red	1
1973	10	Jug	2011-12-04	07:31:21	63.16	white	1
1973	10	Jug	2011-12-04	07:44:04	12.26	white	1
1973	10	Jug	2011-12-04	07:45:29	60.16	NA	1
1973	10	Jug	2011-12-04	08:01:01	15.61	NA	1
1973	10	Jug	2011-12-04	10:12:37	22.48	NA	1
1973	10	Jug	2011-12-04	12:22:42	79.27	NA	1
1973	10	Jug	2011-12-04	12:27:56	29.13	NA	1
1973	10	Jug	2011-12-04	12:43:23	129.68	white	1
1973	10	Jug	2011-12-04	12:49:39	32.33	NA	1
1973	10	Jug	2011-12-04	14:18:14	34.33	NA	1
1973	10	Jug	2011-12-04	17:18:23	110.91	red	1
1973	10	Jug	2011-12-04	18:05:04	5.5	NA	1
1973	10	Jug	2011-12-04	19:06:06	5.16	NA	1
1973	10	Jug	2011-12-04	19:27:50	10.61	NA	1
1973	10	Jug	2011-12-04	19:30:23	5.5	NA	1
1973	10	Jug	2011-12-04	19:47:20	39.79	NA	1
1973	10	Jug	2011-12-04	19:50:05	29.28	NA	1
1973	10	Jug	2011-12-04	19:59:34	25.82	NA	1
1973	10	Jug	2011-12-04	20:52:18	20.42	NA	1
1973	10	Jug	2011-12-04	20:54:15	31.94	NA	1
1973	10	Jug	2011-12-04	21:36:35	12.91	NA	1
1973	10	Jug	2011-12-04	22:28:06	19.62	NA	1
1973	10	Jug	2011-12-04	22:54:29	23.42	NA	1
1973	10	Jug	2011-12-04	23:01:55	10.76	NA	1
1973	10	Jug	2011-12-04	23:19:54	8.06	white	1
1973	10	Jug	2011-12-04	23:35:10	48.64	NA	1
1973	10	Jug	2011-12-04	23:41:19	149.55	NA	1
1973	10	Jug	2011-12-05	05:12:02	1	NA	1
1973	10	Jug	2011-12-05	06:02:17	1.1	NA	1
1973	10	Jug	2011-12-05	06:41:24	84.63	NA	1
1973	10	Jug	2011-12-05	07:35:18	4.56	white	1
1973	10	Jug	2011-12-05	07:52:03	13.76	NA	1
1973	10	Jug	2011-12-05	07:53:35	39.19	NA	1
1973	10	Jug	2011-12-05	07:55:42	20.57	NA	1
1973	10	Jug	2011-12-05	08:06:41	100.35	NA	1
1973	10	Jug	2011-12-05	08:54:43	6.6	NA	1
1973	10	Jug	2011-12-05	10:02:06	7.71	NA	1
1973	10	Jug	2011-12-05	13:31:53	15.36	NA	1
1973	10	Jug	2011-12-05	14:00:38	19.62	NA	1
1973	10	Jug	2011-12-05	14:21:54	28.88	white	1
1973	10	Jug	2011-12-05	14:23:34	53.1	NA	1
1973	10	Jug	2011-12-05	16:32:25	14.56	NA	1
1973	10	Jug	2011-12-05	16:39:07	10.21	NA	1
1973	10	Jug	2011-12-05	16:53:07	25.73	NA	1
1973	10	Jug	2011-12-05	17:58:58	18.31	NA	1
1973	10	Jug	2011-12-05	18:01:55	15.37	NA	1
1973	10	Jug	2011-12-05	20:27:54	11.51	NA	1
1973	10	Jug	2011-12-05	21:06:29	7.21	NA	1
1973	10	Jug	2011-12-05	21:10:28	3.7	NA	1
1973	10	Jug	2011-12-05	21:57:59	29.63	NA	1
1973	10	Jug	2011-12-05	22:36:19	28.63	red	1
1973	10	Jug	2011-12-05	23:02:51	16.36	NA	1
1973	10	Jug	2011-12-05	23:06:31	3.81	NA	1
1973	10	Jug	2011-12-05	23:09:15	24.92	white	1
1973	10	Jug	2011-12-05	23:11:42	10.16	white	1
1973	10	Jug	2011-12-05	23:26:23	6.76	NA	1
1973	10	Jug	2011-12-05	23:34:02	8.8	NA	1
1973	10	Jug	2011-12-06	07:12:13	2.81	NA	1
1973	10	Jug	2011-12-06	07:18:51	65.36	NA	1
1973	10	Jug	2011-12-06	07:21:52	3.3	NA	1
1973	10	Jug	2011-12-06	07:23:59	24.23	red	1
1973	10	Jug	2011-12-06	07:51:24	92.14	NA	1
1973	10	Jug	2011-12-06	07:56:17	79.62	NA	1
1973	10	Jug	2011-12-06	09:38:54	30.93	NA	1
1973	10	Jug	2011-12-06	15:23:43	20.77	NA	1
1973	10	Jug	2011-12-06	15:32:39	7.06	NA	1
1973	10	Jug	2011-12-06	15:52:17	23.97	NA	1
1973	10	Jug	2011-12-06	18:50:14	15.77	NA	1
1973	10	Jug	2011-12-06	20:18:19	144.44	NA	1
1973	10	Jug	2011-12-06	20:47:17	33.98	red	1
1973	10	Jug	2011-12-06	21:53:07	20.62	NA	1
1973	10	Jug	2011-12-06	21:59:22	14.32	NA	1
1973	10	Jug	2011-12-06	23:04:16	10.66	NA	1
1973	10	Jug	2011-12-06	23:20:45	21.12	NA	1
1973	10	Jug	2011-12-07	00:08:37	7.35	NA	1
1948	11	Jug	2011-12-02	12:59:28	6.31	NA	2
1948	11	Jug	2011-12-02	14:18:44	49.85	NA	2
1948	11	Jug	2011-12-02	14:22:33	38.73	NA	2
1948	11	Jug	2011-12-02	15:42:01	13.22	NA	2
1948	11	Jug	2011-12-02	16:11:19	47.04	red	2
1948	11	Jug	2011-12-02	17:24:40	10.76	NA	2
1948	11	Jug	2011-12-02	17:36:32	11.57	NA	2
1948	11	Jug	2011-12-02	18:14:12	13.91	NA	2
1948	11	Jug	2011-12-02	20:38:57	1.35	NA	2
1948	11	Jug	2011-12-03	07:31:05	20.12	NA	2
1948	11	Jug	2011-12-03	07:34:12	3.25	NA	2
1948	11	Jug	2011-12-03	08:37:22	29.93	white	2
1948	11	Jug	2011-12-03	08:48:44	24.07	NA	2
1948	11	Jug	2011-12-03	09:13:24	40.34	NA	2
1948	11	Jug	2011-12-03	09:16:44	19.47	NA	2
1948	11	Jug	2011-12-03	10:02:58	8.66	white	2
1948	11	Jug	2011-12-03	13:23:19	8.61	NA	2
1948	11	Jug	2011-12-03	13:39:24	1.65	NA	2
1948	11	Jug	2011-12-03	15:30:57	9.41	NA	2
1948	11	Jug	2011-12-03	17:56:23	1.8	NA	2
1948	11	Jug	2011-12-04	08:04:54	10.26	NA	2
1948	11	Jug	2011-12-04	08:30:13	2.2	NA	2
1948	11	Jug	2011-12-04	12:46:39	44.14	white	2
1948	11	Jug	2011-12-04	12:50:34	91.94	red	2
1948	11	Jug	2011-12-04	12:57:41	98	red	2
1948	11	Jug	2011-12-04	13:07:24	93.74	NA	2
1948	11	Jug	2011-12-04	13:10:56	63.12	NA	2
1948	11	Jug	2011-12-04	13:17:58	13.66	NA	2
1948	11	Jug	2011-12-04	17:01:33	6.96	NA	2
1948	11	Jug	2011-12-05	09:59:44	2.2	NA	2
1948	11	Jug	2011-12-05	18:08:01	6.65	NA	2
1948	11	Jug	2011-12-06	12:14:08	4.21	NA	2
1948	11	Jug	2011-12-06	15:22:33	1.15	NA	2
1948	11	Jug	2011-12-07	06:02:55	1.15	NA	2
1948	11	Jug	2011-12-07	07:52:31	6.91	NA	2
1948	11	Jug	2011-12-07	10:47:32	6.56	white	2
1666	12	Jug	2011-12-02	16:18:42	38.09	NA	1
1666	12	Jug	2011-12-02	16:29:44	6.71	NA	1
1666	12	Jug	2011-12-02	16:32:41	48.69	white	1
1666	12	Jug	2011-12-02	16:43:43	3.06	NA	1
1666	12	Jug	2011-12-02	16:45:56	23.32	NA	1
1666	12	Jug	2011-12-02	17:43:05	61.11	red	1
1666	12	Jug	2011-12-02	17:58:45	5.8	NA	1
1666	12	Jug	2011-12-02	18:00:52	19.47	white	1
1666	12	Jug	2011-12-02	18:54:59	11.91	NA	1
1666	12	Jug	2011-12-02	19:01:36	31.38	NA	1
1666	12	Jug	2011-12-02	19:21:12	8.71	NA	1
1666	12	Jug	2011-12-02	19:27:58	25.43	NA	1
1666	12	Jug	2011-12-02	20:42:33	25.17	NA	1
1666	12	Jug	2011-12-02	21:10:30	7.81	NA	1
1666	12	Jug	2011-12-02	21:42:28	62.86	NA	1
1666	12	Jug	2011-12-02	21:45:08	23.47	NA	1
1666	12	Jug	2011-12-02	21:46:37	4.01	NA	1
1666	12	Jug	2011-12-02	21:55:17	15.76	NA	1
1666	12	Jug	2011-12-02	21:56:47	76.13	red	1
1666	12	Jug	2011-12-02	22:00:56	235.53	red	1
1666	12	Jug	2011-12-02	22:37:26	16.86	NA	1
1666	12	Jug	2011-12-02	23:16:59	37.74	NA	1
1666	12	Jug	2011-12-02	23:24:48	38.44	red	1
1666	12	Jug	2011-12-02	23:27:27	20.22	NA	1
1666	12	Jug	2011-12-02	23:41:48	6.6	NA	1
1666	12	Jug	2011-12-02	23:43:14	64.06	white	1
1666	12	Jug	2011-12-02	23:49:36	6.81	NA	1
1666	12	Jug	2011-12-02	23:53:20	33.58	NA	1
1666	12	Jug	2011-12-03	00:23:55	9.16	NA	1
1666	12	Jug	2011-12-03	04:42:54	47.9	NA	1
1666	12	Jug	2011-12-03	04:49:51	7.96	NA	1
1666	12	Jug	2011-12-03	05:08:53	13.21	NA	1
1666	12	Jug	2011-12-03	06:59:02	37.09	NA	1
1666	12	Jug	2011-12-03	07:07:29	16.26	NA	1
1666	12	Jug	2011-12-03	07:09:53	5.41	NA	1
1666	12	Jug	2011-12-03	07:54:56	5.3	NA	1
1666	12	Jug	2011-12-03	07:57:47	50.95	NA	1
1666	12	Jug	2011-12-03	08:20:48	12.81	NA	1
1666	12	Jug	2011-12-03	08:23:33	29.63	NA	1
1666	12	Jug	2011-12-03	08:29:41	9.21	NA	1
1666	12	Jug	2011-12-03	08:32:13	86.03	red	1
1666	12	Jug	2011-12-03	09:11:53	21.32	NA	1
1666	12	Jug	2011-12-03	09:44:27	5.86	NA	1
1666	12	Jug	2011-12-03	09:55:14	70.17	NA	1
1666	12	Jug	2011-12-03	10:14:26	62.81	red	1
1666	12	Jug	2011-12-03	10:16:34	65.86	NA	1
1666	12	Jug	2011-12-03	10:20:55	35.73	NA	1
1666	12	Jug	2011-12-03	10:26:35	3.45	NA	1
1666	12	Jug	2011-12-03	11:14:52	20.77	NA	1
1666	12	Jug	2011-12-03	11:25:54	18.02	NA	1
1666	12	Jug	2011-12-03	12:04:09	19.87	NA	1
1666	12	Jug	2011-12-03	13:53:46	4.81	NA	1
1666	12	Jug	2011-12-03	14:01:12	3.4	NA	1
1666	12	Jug	2011-12-03	14:25:49	9.91	NA	1
1666	12	Jug	2011-12-03	15:03:24	1.75	NA	1
1666	12	Jug	2011-12-03	15:08:04	2.85	NA	1
1666	12	Jug	2011-12-03	15:10:15	2.6	NA	1
1666	12	Jug	2011-12-03	15:11:25	57.96	red	1
1666	12	Jug	2011-12-03	16:05:58	20.77	NA	1
1666	12	Jug	2011-12-03	16:34:30	26.33	NA	1
1666	12	Jug	2011-12-03	16:59:08	16.81	NA	1
1666	12	Jug	2011-12-03	17:20:04	56.51	white	1
1666	12	Jug	2011-12-03	17:23:44	15.26	NA	1
1666	12	Jug	2011-12-03	19:02:12	12.86	NA	1
1666	12	Jug	2011-12-03	19:06:06	54.65	red	1
1666	12	Jug	2011-12-03	19:46:26	35.79	red	1
1666	12	Jug	2011-12-03	20:12:15	23.42	NA	1
1666	12	Jug	2011-12-03	22:50:53	17.17	NA	1
1666	12	Jug	2011-12-03	23:34:25	18.27	NA	1
1666	12	Jug	2011-12-03	23:37:22	39.79	red	1
1666	12	Jug	2011-12-03	23:41:59	1.4	NA	1
1666	12	Jug	2011-12-04	00:01:13	25.97	NA	1
1666	12	Jug	2011-12-04	05:35:56	17.57	NA	1
1666	12	Jug	2011-12-04	07:22:34	1.7	NA	1
1666	12	Jug	2011-12-04	07:24:30	26.73	NA	1
1666	12	Jug	2011-12-04	07:27:12	2.6	NA	1
1666	12	Jug	2011-12-04	08:28:55	46.64	NA	1
1666	12	Jug	2011-12-04	09:16:08	5.71	NA	1
1666	12	Jug	2011-12-04	09:38:58	85.73	red	1
1666	12	Jug	2011-12-04	10:12:43	1.25	NA	1
1666	12	Jug	2011-12-04	11:05:05	5.26	NA	1
1666	12	Jug	2011-12-04	11:30:58	94.79	white	1
1666	12	Jug	2011-12-04	11:34:03	15.92	NA	1
1666	12	Jug	2011-12-04	11:37:52	2.05	NA	1
1666	12	Jug	2011-12-04	12:48:45	15.11	NA	1
1666	12	Jug	2011-12-04	12:59:02	20.22	NA	1
1666	12	Jug	2011-12-04	13:52:31	2.41	NA	1
1666	12	Jug	2011-12-04	14:00:21	31.13	NA	1
1666	12	Jug	2011-12-04	14:23:32	6.3	NA	1
1666	12	Jug	2011-12-04	14:33:43	18.22	NA	1
1666	12	Jug	2011-12-04	15:08:36	134.03	NA	1
1666	12	Jug	2011-12-04	15:14:48	88.24	NA	1
1666	12	Jug	2011-12-04	15:47:11	22.87	NA	1
1666	12	Jug	2011-12-04	16:01:08	84.84	NA	1
1666	12	Jug	2011-12-04	16:30:43	23.92	NA	1
1666	12	Jug	2011-12-04	17:32:38	4.75	NA	1
1666	12	Jug	2011-12-04	17:53:07	51.45	NA	1
1666	12	Jug	2011-12-04	17:59:25	58.01	NA	1
1666	12	Jug	2011-12-04	18:07:44	7.31	NA	1
1666	12	Jug	2011-12-04	18:12:27	20.27	NA	1
1666	12	Jug	2011-12-04	18:18:35	8.5	NA	1
1666	12	Jug	2011-12-04	18:29:14	23.53	NA	1
1666	12	Jug	2011-12-04	18:35:15	50.5	NA	1
1666	12	Jug	2011-12-04	18:38:17	20.57	NA	1
1666	12	Jug	2011-12-04	18:45:54	17.91	NA	1
1666	12	Jug	2011-12-04	18:50:47	26.78	NA	1
1666	12	Jug	2011-12-04	19:47:03	22.37	NA	1
1666	12	Jug	2011-12-04	19:53:13	9.91	NA	1
1666	12	Jug	2011-12-04	22:07:10	92.59	red	1
1666	12	Jug	2011-12-04	22:22:02	6.31	NA	1
1666	12	Jug	2011-12-04	22:58:28	9.51	NA	1
1666	12	Jug	2011-12-04	23:47:22	46.89	NA	1
1666	12	Jug	2011-12-04	23:50:01	37.54	white	1
1666	12	Jug	2011-12-05	00:06:59	3.4	NA	1
1666	12	Jug	2011-12-05	00:09:28	29.33	NA	1
1666	12	Jug	2011-12-05	00:15:55	18.72	NA	1
1666	12	Jug	2011-12-05	00:17:58	3.1	NA	1
1666	12	Jug	2011-12-05	00:23:15	3.25	NA	1
1666	12	Jug	2011-12-05	04:35:19	30.78	NA	1
1666	12	Jug	2011-12-05	04:56:02	31.53	red	1
1666	12	Jug	2011-12-05	05:05:45	22.28	NA	1
1666	12	Jug	2011-12-05	05:29:32	1.6	NA	1
1666	12	Jug	2011-12-05	05:33:36	7.6	NA	1
2042	13	Jug	2011-12-02	20:34:14	14.21	NA	2
2042	13	Jug	2011-12-03	06:02:36	6.86	NA	2
2042	13	Jug	2011-12-03	11:29:07	35.34	NA	2
2042	13	Jug	2011-12-03	18:02:29	22.92	NA	2
2042	13	Jug	2011-12-03	18:07:11	66.11	NA	2
2042	13	Jug	2011-12-03	18:12:06	12.91	NA	2
2042	13	Jug	2011-12-03	18:14:28	12.42	white	2
2042	13	Jug	2011-12-03	18:17:07	77.32	NA	2
2042	13	Jug	2011-12-04	08:20:46	17.52	NA	2
2042	13	Jug	2011-12-04	08:42:59	53.6	NA	2
2042	13	Jug	2011-12-04	08:48:34	126.17	NA	2
2042	13	Jug	2011-12-04	12:02:33	10.81	NA	2
2042	13	Jug	2011-12-04	12:03:56	31.73	white	2
2042	13	Jug	2011-12-04	12:08:12	7.26	white	2
2042	13	Jug	2011-12-04	12:10:23	44.55	white	2
2042	13	Jug	2011-12-04	12:13:57	64.76	NA	2
2042	13	Jug	2011-12-04	14:45:13	1.85	NA	2
2042	13	Jug	2011-12-04	16:03:03	19.47	NA	2
2042	13	Jug	2011-12-04	19:43:38	10.26	NA	2
2042	13	Jug	2011-12-05	07:55:52	18.57	NA	2
2042	13	Jug	2011-12-05	07:59:19	35.73	white	2
2042	13	Jug	2011-12-05	08:31:26	73.22	red	2
2042	13	Jug	2011-12-05	11:43:25	27.23	NA	2
2042	13	Jug	2011-12-05	11:45:21	83.48	NA	2
2042	13	Jug	2011-12-05	15:45:41	3.76	NA	2
2042	13	Jug	2011-12-06	08:11:17	53.01	NA	2
2042	13	Jug	2011-12-06	17:57:09	2	NA	2
2042	13	Jug	2011-12-06	18:15:17	13.21	NA	2
2042	13	Jug	2011-12-06	20:16:54	2.9	NA	2
2042	13	Jug	2011-12-06	20:23:18	1.46	NA	2
2042	13	Jug	2011-12-07	07:10:05	10.81	NA	2
2042	13	Jug	2011-12-07	10:36:38	59.45	NA	2
2042	13	Jug	2011-12-07	10:38:44	40.29	NA	2
1672	14	Jug	2011-12-02	11:59:30	1.8	NA	1
1672	14	Jug	2011-12-02	12:11:47	10.46	NA	1
1672	14	Jug	2011-12-02	15:45:34	43.09	NA	1
1672	14	Jug	2011-12-02	15:50:44	103.6	NA	1
1672	14	Jug	2011-12-02	17:32:00	11.11	NA	1
1672	14	Jug	2011-12-02	17:35:13	22.07	white	1
1672	14	Jug	2011-12-02	18:14:26	48.8	white	1
1672	14	Jug	2011-12-02	18:18:11	18.77	NA	1
1672	14	Jug	2011-12-02	18:21:00	6.76	NA	1
1672	14	Jug	2011-12-02	18:23:27	26.52	NA	1
1672	14	Jug	2011-12-02	18:26:35	31.83	NA	1
1672	14	Jug	2011-12-02	18:37:00	18.92	NA	1
1672	14	Jug	2011-12-02	20:11:48	21.42	NA	1
1672	14	Jug	2011-12-02	20:46:58	67.92	NA	1
1672	14	Jug	2011-12-02	22:00:21	39.74	NA	1
1672	14	Jug	2011-12-02	22:03:54	29.23	NA	1
1672	14	Jug	2011-12-02	22:12:20	17.51	NA	1
1672	14	Jug	2011-12-02	22:27:38	10.46	NA	1
1672	14	Jug	2011-12-02	22:55:15	7.01	NA	1
1672	14	Jug	2011-12-03	06:09:33	17.82	NA	1
1672	14	Jug	2011-12-03	06:32:12	27.38	NA	1
1672	14	Jug	2011-12-03	06:36:08	5.4	NA	1
1672	14	Jug	2011-12-03	06:37:23	3.7	NA	1
1672	14	Jug	2011-12-03	06:39:45	5.21	NA	1
1672	14	Jug	2011-12-03	06:42:11	73.92	white	1
1672	14	Jug	2011-12-03	07:24:51	26.73	white	1
1672	14	Jug	2011-12-03	07:28:40	32.54	red	1
1672	14	Jug	2011-12-03	07:30:44	63.01	NA	1
1672	14	Jug	2011-12-03	07:35:57	31.68	NA	1
1672	14	Jug	2011-12-03	07:40:38	95.34	NA	1
1672	14	Jug	2011-12-03	07:48:25	172.77	white	1
1672	14	Jug	2011-12-03	07:55:54	1.3	NA	1
1672	14	Jug	2011-12-03	07:57:23	4.71	NA	1
1672	14	Jug	2011-12-03	07:59:28	21.62	NA	1
1672	14	Jug	2011-12-03	08:41:49	4.75	NA	1
1672	14	Jug	2011-12-03	08:55:58	11.46	NA	1
1672	14	Jug	2011-12-03	09:32:34	27.53	NA	1
1672	14	Jug	2011-12-03	09:56:59	22.72	NA	1
1672	14	Jug	2011-12-03	11:25:09	9.71	white	1
1672	14	Jug	2011-12-03	11:28:17	7.15	NA	1
1672	14	Jug	2011-12-03	12:04:55	43.5	NA	1
1672	14	Jug	2011-12-03	13:44:49	19.42	NA	1
1672	14	Jug	2011-12-03	15:05:35	113.81	NA	1
1672	14	Jug	2011-12-03	15:10:47	22.47	NA	1
1672	14	Jug	2011-12-03	15:13:25	29.33	white	1
1672	14	Jug	2011-12-03	15:17:51	142.14	NA	1
1672	14	Jug	2011-12-03	15:22:15	36.64	NA	1
1672	14	Jug	2011-12-03	15:57:22	5.1	NA	1
1672	14	Jug	2011-12-03	16:31:49	26.73	NA	1
1672	14	Jug	2011-12-03	18:02:28	8.27	NA	1
1672	14	Jug	2011-12-03	20:30:42	7.21	NA	1
1672	14	Jug	2011-12-03	21:07:02	35.08	NA	1
1672	14	Jug	2011-12-03	21:11:14	4.25	NA	1
1672	14	Jug	2011-12-04	05:08:20	19.87	NA	1
1672	14	Jug	2011-12-04	06:17:20	9.81	NA	1
1672	14	Jug	2011-12-04	06:18:53	5.81	NA	1
1672	14	Jug	2011-12-04	06:22:54	8.3	NA	1
1672	14	Jug	2011-12-04	06:25:07	55.11	white	1
1672	14	Jug	2011-12-04	07:01:45	81.23	NA	1
1672	14	Jug	2011-12-04	07:20:58	34.48	NA	1
1672	14	Jug	2011-12-04	07:22:43	34.78	red	1
1672	14	Jug	2011-12-04	08:37:12	14.62	NA	1
1672	14	Jug	2011-12-04	08:45:30	42.34	white	1
1672	14	Jug	2011-12-04	08:55:00	60.11	NA	1
1672	14	Jug	2011-12-04	09:05:14	114.56	white	1
1672	14	Jug	2011-12-04	09:10:01	8.91	NA	1
1672	14	Jug	2011-12-04	09:11:10	15.26	NA	1
1672	14	Jug	2011-12-04	09:15:02	44.6	NA	1
1672	14	Jug	2011-12-04	09:38:30	25.37	red	1
1672	14	Jug	2011-12-04	09:40:24	24.47	NA	1
1672	14	Jug	2011-12-04	10:03:07	158.81	white	1
1672	14	Jug	2011-12-04	10:09:30	12.46	NA	1
1672	14	Jug	2011-12-04	10:12:12	30.78	NA	1
1672	14	Jug	2011-12-04	10:14:45	2.3	NA	1
1672	14	Jug	2011-12-04	10:15:53	32.03	NA	1
1672	14	Jug	2011-12-04	10:20:04	10.36	NA	1
1672	14	Jug	2011-12-04	10:24:02	3.06	NA	1
1672	14	Jug	2011-12-04	14:51:39	1.35	NA	1
1672	14	Jug	2011-12-04	15:24:15	34.68	NA	1
1672	14	Jug	2011-12-04	15:57:27	30.63	NA	1
1672	14	Jug	2011-12-04	15:59:41	14.52	NA	1
1672	14	Jug	2011-12-04	16:01:40	68.91	NA	1
1672	14	Jug	2011-12-04	16:06:39	14.62	NA	1
1672	14	Jug	2011-12-04	17:06:29	1.95	NA	1
1672	14	Jug	2011-12-04	17:16:42	71.92	NA	1
1672	14	Jug	2011-12-04	17:25:23	20.02	NA	1
1672	14	Jug	2011-12-04	20:50:46	41.64	NA	1
1672	14	Jug	2011-12-04	22:02:11	44.64	NA	1
1672	14	Jug	2011-12-04	22:19:31	5.71	NA	1
1672	14	Jug	2011-12-04	22:41:29	74.87	NA	1
1672	14	Jug	2011-12-05	04:11:25	8.41	NA	1
1672	14	Jug	2011-12-05	04:18:01	23.42	NA	1
1672	14	Jug	2011-12-05	04:21:16	73.57	NA	1
1672	14	Jug	2011-12-05	04:53:06	1.55	NA	1
1672	14	Jug	2011-12-05	05:08:16	45.2	NA	1
1672	14	Jug	2011-12-05	06:10:54	59.36	NA	1
1672	14	Jug	2011-12-05	06:14:43	152.19	NA	1
1672	14	Jug	2011-12-05	06:22:59	14.22	NA	1
1672	14	Jug	2011-12-05	06:26:05	61.31	NA	1
2052	15	Jug	2011-12-02	14:22:44	23.38	NA	2
2052	15	Jug	2011-12-02	16:31:42	5.35	NA	2
2052	15	Jug	2011-12-02	16:35:05	104.2	NA	2
2052	15	Jug	2011-12-02	16:40:11	2.5	white	2
2052	15	Jug	2011-12-02	16:55:20	1.2	white	2
2052	15	Jug	2011-12-02	21:09:11	11.97	NA	2
2052	15	Jug	2011-12-02	22:07:43	21.52	NA	2
2052	15	Jug	2011-12-03	02:53:26	12.26	NA	2
2052	15	Jug	2011-12-03	04:07:54	11.16	NA	2
2052	15	Jug	2011-12-03	05:35:41	18.97	NA	2
2052	15	Jug	2011-12-03	05:38:36	2.1	NA	2
2052	15	Jug	2011-12-03	05:39:42	1.85	NA	2
2052	15	Jug	2011-12-03	05:47:08	12.81	NA	2
2052	15	Jug	2011-12-03	08:02:27	28.83	NA	2
2052	15	Jug	2011-12-03	08:04:25	3.76	NA	2
2052	15	Jug	2011-12-03	08:09:20	125.87	red	2
2052	15	Jug	2011-12-03	08:42:49	21.12	NA	2
2052	15	Jug	2011-12-03	10:04:24	3.05	NA	2
2052	15	Jug	2011-12-03	14:39:07	33.48	red	2
2052	15	Jug	2011-12-03	16:16:45	6.71	NA	2
2052	15	Jug	2011-12-03	16:21:37	3.55	NA	2
2052	15	Jug	2011-12-03	16:28:17	1.91	NA	2
2052	15	Jug	2011-12-03	17:40:24	21.57	red	2
2052	15	Jug	2011-12-03	17:44:51	26.27	NA	2
2052	15	Jug	2011-12-03	19:33:45	1.95	NA	2
2052	15	Jug	2011-12-03	20:17:11	5.86	NA	2
2052	15	Jug	2011-12-03	20:19:02	3.25	NA	2
2052	15	Jug	2011-12-03	20:22:45	19.62	NA	2
2052	15	Jug	2011-12-03	20:24:25	15.42	NA	2
2052	15	Jug	2011-12-03	20:25:46	38.28	NA	2
2052	15	Jug	2011-12-03	21:22:17	15.82	NA	2
2052	15	Jug	2011-12-04	02:46:27	3.65	NA	2
2052	15	Jug	2011-12-04	06:55:36	49.25	NA	2
2052	15	Jug	2011-12-04	07:36:13	13.36	NA	2
2052	15	Jug	2011-12-04	09:06:21	9.31	NA	2
2052	15	Jug	2011-12-04	09:07:40	5.71	NA	2
2052	15	Jug	2011-12-04	16:13:10	30.73	NA	2
2052	15	Jug	2011-12-04	17:12:59	100.96	NA	2
2052	15	Jug	2011-12-04	17:17:14	70.16	NA	2
2052	15	Jug	2011-12-04	17:29:43	4.31	NA	2
2052	15	Jug	2011-12-04	17:30:50	39.59	red	2
2052	15	Jug	2011-12-04	20:33:51	17.71	NA	2
2052	15	Jug	2011-12-04	21:04:54	2.21	NA	2
2052	15	Jug	2011-12-04	21:06:23	2.51	NA	2
2052	15	Jug	2011-12-04	21:07:46	12.16	NA	2
2052	15	Jug	2011-12-04	21:47:08	16.31	NA	2
2052	15	Jug	2011-12-05	01:26:34	15.62	NA	2
2052	15	Jug	2011-12-05	02:45:07	9.26	NA	2
2052	15	Jug	2011-12-05	03:15:01	1.7	NA	2
2052	15	Jug	2011-12-05	05:51:32	17.37	NA	2
2052	15	Jug	2011-12-05	06:43:50	12.66	NA	2
2052	15	Jug	2011-12-05	06:56:23	10.91	NA	2
2052	15	Jug	2011-12-05	09:02:50	9.51	NA	2
2052	15	Jug	2011-12-05	09:05:25	35.09	NA	2
2052	15	Jug	2011-12-05	09:11:13	3	NA	2
2052	15	Jug	2011-12-05	09:13:30	16.47	NA	2
2052	15	Jug	2011-12-05	09:15:07	40.28	red	2
2052	15	Jug	2011-12-05	10:58:04	7.56	NA	2
2052	15	Jug	2011-12-05	11:00:30	13.66	NA	2
2052	15	Jug	2011-12-05	13:52:34	4.86	NA	2
2052	15	Jug	2011-12-05	14:38:24	20.22	NA	2
2052	15	Jug	2011-12-05	15:40:31	10.41	NA	2
2052	15	Jug	2011-12-05	16:19:42	1.6	NA	2
2052	15	Jug	2011-12-05	19:14:25	10.36	NA	2
2052	15	Jug	2011-12-05	20:58:10	86.68	NA	2
2052	15	Jug	2011-12-05	21:03:15	43.3	NA	2
2052	15	Jug	2011-12-05	22:06:24	1.31	NA	2
2052	15	Jug	2011-12-05	22:10:11	3.75	NA	2
2052	15	Jug	2011-12-06	02:32:24	4.2	NA	2
2052	15	Jug	2011-12-06	02:34:34	15.27	NA	2
2052	15	Jug	2011-12-06	02:39:06	10.01	NA	2
2052	15	Jug	2011-12-06	07:07:42	28.93	NA	2
2052	15	Jug	2011-12-06	09:32:37	3.05	NA	2
2052	15	Jug	2011-12-06	09:34:15	1.3	NA	2
2052	15	Jug	2011-12-06	11:56:44	6.76	NA	2
2052	15	Jug	2011-12-06	12:29:11	18.31	NA	2
2052	15	Jug	2011-12-06	14:54:23	8.15	red	2
2052	15	Jug	2011-12-06	16:55:54	7.76	NA	2
2052	15	Jug	2011-12-06	18:25:22	13.96	NA	2
2052	15	Jug	2011-12-06	22:17:37	4.56	NA	2
2052	15	Jug	2011-12-06	22:41:37	7.91	NA	2
2052	15	Jug	2011-12-07	02:52:13	16.51	NA	2
2052	15	Jug	2011-12-07	05:49:56	4.91	NA	2
2052	15	Jug	2011-12-07	07:50:02	15.16	NA	2
2052	15	Jug	2011-12-07	07:52:23	41.04	NA	2
2052	15	Jug	2011-12-07	09:55:22	21.77	NA	2
2052	15	Jug	2011-12-07	10:00:35	25.82	NA	2
1903	16	Jug	2011-12-02	12:42:09	8.21	NA	1
1903	16	Jug	2011-12-02	12:51:26	18.06	NA	1
1903	16	Jug	2011-12-02	13:21:28	6.21	NA	1
1903	16	Jug	2011-12-02	13:23:47	9.91	NA	1
1903	16	Jug	2011-12-02	15:22:40	8.46	NA	1
1903	16	Jug	2011-12-02	18:11:47	5.45	NA	1
1903	16	Jug	2011-12-02	20:05:57	19.82	NA	1
1903	16	Jug	2011-12-02	21:20:30	72.97	NA	1
1903	16	Jug	2011-12-02	21:51:46	13.01	NA	1
1903	16	Jug	2011-12-03	04:33:00	22.68	NA	1
1903	16	Jug	2011-12-03	05:41:26	66.86	NA	1
1903	16	Jug	2011-12-03	08:47:58	24.78	NA	1
1903	16	Jug	2011-12-03	08:51:13	60.4	NA	1
1903	16	Jug	2011-12-03	15:56:47	198.35	NA	1
1903	16	Jug	2011-12-03	16:18:22	39.84	NA	1
1903	16	Jug	2011-12-03	18:03:45	79.98	NA	1
1903	16	Jug	2011-12-03	18:51:41	18.21	NA	1
1903	16	Jug	2011-12-03	20:46:31	14.62	NA	1
1903	16	Jug	2011-12-03	21:28:27	11.56	NA	1
1903	16	Jug	2011-12-03	21:56:40	3.55	NA	1
1903	16	Jug	2011-12-03	22:33:42	39.89	NA	1
1903	16	Jug	2011-12-04	05:02:59	13.06	NA	1
1903	16	Jug	2011-12-04	05:19:58	14.12	NA	1
1903	16	Jug	2011-12-04	05:21:48	165.86	NA	1
1903	16	Jug	2011-12-04	05:49:42	22.82	NA	1
1903	16	Jug	2011-12-04	08:11:43	16.22	NA	1
1903	16	Jug	2011-12-04	08:40:14	5.7	NA	1
1903	16	Jug	2011-12-04	09:25:32	31.28	NA	1
1903	16	Jug	2011-12-04	10:10:11	15.22	NA	1
1903	16	Jug	2011-12-04	13:25:01	23.77	NA	1
1903	16	Jug	2011-12-04	13:37:16	3.2	NA	1
1903	16	Jug	2011-12-04	15:18:22	45.1	NA	1
1903	16	Jug	2011-12-04	15:30:47	250.84	white	1
1903	16	Jug	2011-12-04	15:39:28	2.55	NA	1
1903	16	Jug	2011-12-04	15:56:14	114.97	NA	1
1903	16	Jug	2011-12-04	16:04:35	170.61	NA	1
1903	16	Jug	2011-12-04	16:14:29	3.51	NA	1
1903	16	Jug	2011-12-04	16:22:28	237.98	NA	1
1903	16	Jug	2011-12-04	18:24:37	44.64	NA	1
1903	16	Jug	2011-12-04	18:29:44	29.98	NA	1
1903	16	Jug	2011-12-04	18:49:43	14.26	NA	1
1903	16	Jug	2011-12-04	18:52:47	60.06	NA	1
1903	16	Jug	2011-12-04	19:18:01	38.49	NA	1
1903	16	Jug	2011-12-04	19:42:50	11.71	NA	1
1903	16	Jug	2011-12-04	21:53:44	37.44	NA	1
1903	16	Jug	2011-12-04	21:55:22	26.07	NA	1
1903	16	Jug	2011-12-05	04:37:02	4.21	NA	1
1903	16	Jug	2011-12-05	06:09:42	7.7	NA	1
1903	16	Jug	2011-12-05	07:02:58	9.66	red	1
1903	16	Jug	2011-12-05	07:29:28	19.47	NA	1
1903	16	Jug	2011-12-05	07:46:13	56.76	NA	1
1903	16	Jug	2011-12-05	09:35:22	36.63	NA	1
1903	16	Jug	2011-12-05	13:13:45	65.07	white	1
1903	16	Jug	2011-12-05	14:48:20	29.22	white	1
1903	16	Jug	2011-12-05	14:51:32	23.58	NA	1
1903	16	Jug	2011-12-05	15:31:38	23.52	NA	1
1903	16	Jug	2011-12-05	15:35:20	10.61	NA	1
1903	16	Jug	2011-12-05	15:37:30	5.76	NA	1
1903	16	Jug	2011-12-05	16:32:56	34.39	NA	1
1903	16	Jug	2011-12-05	18:29:06	70.77	NA	1
1903	16	Jug	2011-12-05	18:33:46	16.21	NA	1
1903	16	Jug	2011-12-05	18:35:30	26.58	NA	1
1903	16	Jug	2011-12-05	18:49:33	15.06	NA	1
1903	16	Jug	2011-12-05	18:53:03	11.41	NA	1
1903	16	Jug	2011-12-05	18:59:04	1.91	NA	1
1903	16	Jug	2011-12-05	19:00:50	39.53	NA	1
1903	16	Jug	2011-12-05	19:25:59	5.66	NA	1
1903	16	Jug	2011-12-05	19:30:51	8.61	NA	1
1903	16	Jug	2011-12-05	20:13:17	72.47	NA	1
1903	16	Jug	2011-12-05	21:40:46	73.77	NA	1
1903	16	Jug	2011-12-06	04:34:08	14.06	NA	1
1903	16	Jug	2011-12-06	05:01:40	17.12	NA	1
1903	16	Jug	2011-12-06	05:56:42	42.79	NA	1
1903	16	Jug	2011-12-06	08:10:03	1.6	NA	1
1903	16	Jug	2011-12-06	08:11:16	45.05	NA	1
1903	16	Jug	2011-12-06	08:27:07	80.23	NA	1
1903	16	Jug	2011-12-06	09:46:29	27.62	NA	1
1903	16	Jug	2011-12-06	09:55:59	8.61	NA	1
1903	16	Jug	2011-12-06	16:21:26	63.26	NA	1
1903	16	Jug	2011-12-06	16:25:46	11.21	NA	1
1903	16	Jug	2011-12-06	16:46:00	33.24	NA	1
1903	16	Jug	2011-12-06	17:53:45	3.75	NA	1
1903	16	Jug	2011-12-06	18:50:29	17.52	NA	1
1903	16	Jug	2011-12-06	19:01:29	36.98	NA	1
1903	16	Jug	2011-12-06	19:05:11	4.76	NA	1
1903	16	Jug	2011-12-06	19:19:57	16.11	NA	1
1903	16	Jug	2011-12-06	19:22:31	7.61	NA	1
1903	16	Jug	2011-12-06	19:35:11	11.01	NA	1
1903	16	Jug	2011-12-06	19:49:59	12.01	NA	1
1903	16	Jug	2011-12-06	20:10:20	36.84	NA	1
1903	16	Jug	2011-12-06	20:16:11	20.02	NA	1
1903	16	Jug	2011-12-06	20:18:25	59.7	NA	1
1903	16	Jug	2011-12-06	20:23:44	3.71	NA	1
1903	16	Jug	2011-12-06	20:26:54	20.42	NA	1
1903	16	Jug	2011-12-06	20:31:31	18.82	red	1
1903	16	Jug	2011-12-06	20:40:30	16.76	NA	1
1903	16	Jug	2011-12-06	20:43:05	9.76	NA	1
1903	16	Jug	2011-12-06	20:44:31	45.55	NA	1
1903	16	Jug	2011-12-06	20:56:30	39.18	NA	1
1903	16	Jug	2011-12-06	21:00:42	13.62	NA	1
1903	16	Jug	2011-12-06	21:07:48	26.32	NA	1
1903	16	Jug	2011-12-06	21:12:28	41.79	NA	1
1903	16	Jug	2011-12-06	21:19:48	40.94	NA	1
1903	16	Jug	2011-12-06	21:33:06	2.05	NA	1
1903	16	Jug	2011-12-06	21:35:55	71.32	NA	1
1903	16	Jug	2011-12-06	21:42:45	49.8	NA	1
1903	16	Jug	2011-12-06	21:44:38	1.6	NA	1
1903	16	Jug	2011-12-06	21:50:28	12.62	NA	1
1903	16	Jug	2011-12-06	21:53:07	21.57	NA	1
1903	16	Jug	2011-12-06	21:57:07	27.32	NA	1
1903	16	Jug	2011-12-06	21:58:44	31.23	NA	1
1903	16	Jug	2011-12-06	22:00:52	86.39	NA	1
1903	16	Jug	2011-12-06	22:05:46	55.9	NA	1
1903	16	Jug	2011-12-06	22:11:57	63.92	NA	1
1903	16	Jug	2011-12-06	22:22:39	36.84	NA	1
1903	16	Jug	2011-12-06	22:31:41	8.41	NA	1
1903	16	Jug	2011-12-06	22:40:24	7.81	NA	1
1903	16	Jug	2011-12-06	22:47:12	15.06	NA	1
1903	16	Jug	2011-12-06	22:58:01	98	NA	1
1903	16	Jug	2011-12-06	23:02:27	70.32	NA	1
1673	17	Jug	2011-12-02	15:08:22	100.65	NA	2
1673	17	Jug	2011-12-02	15:45:28	38.23	white	2
1673	17	Jug	2011-12-02	16:27:16	45.15	NA	2
1673	17	Jug	2011-12-03	05:24:55	30.53	NA	2
1673	17	Jug	2011-12-03	05:26:32	94.09	white	2
1673	17	Jug	2011-12-03	06:20:31	45.44	NA	2
1673	17	Jug	2011-12-03	06:39:27	8.06	NA	2
1673	17	Jug	2011-12-03	06:48:42	12.66	NA	2
1673	17	Jug	2011-12-03	08:38:23	25.88	NA	2
1673	17	Jug	2011-12-03	11:23:46	30.73	NA	2
1673	17	Jug	2011-12-03	13:12:52	37.08	red	2
1673	17	Jug	2011-12-03	13:14:29	43.6	NA	2
1673	17	Jug	2011-12-03	15:55:48	38.58	NA	2
1673	17	Jug	2011-12-03	18:09:08	148.4	NA	2
1673	17	Jug	2011-12-04	05:22:09	55.45	red	2
1673	17	Jug	2011-12-04	06:08:32	33.63	NA	2
1673	17	Jug	2011-12-04	11:41:03	7.76	red	2
1673	17	Jug	2011-12-04	12:21:17	11.16	NA	2
1673	17	Jug	2011-12-04	12:22:36	102.6	NA	2
1673	17	Jug	2011-12-04	12:28:57	66.26	white	2
1673	17	Jug	2011-12-04	15:53:53	40.09	NA	2
1673	17	Jug	2011-12-04	16:07:10	113.81	NA	2
1673	17	Jug	2011-12-04	16:13:39	30.53	NA	2
1673	17	Jug	2011-12-04	16:50:15	22.62	NA	2
1673	17	Jug	2011-12-05	05:08:34	22.12	NA	2
1673	17	Jug	2011-12-05	05:13:40	12.31	NA	2
1673	17	Jug	2011-12-05	05:25:51	30.38	NA	2
1673	17	Jug	2011-12-05	05:31:00	38.89	white	2
1673	17	Jug	2011-12-05	06:17:46	1.85	NA	2
1673	17	Jug	2011-12-05	06:24:30	1.2	NA	2
1673	17	Jug	2011-12-05	06:26:10	2.85	NA	2
1673	17	Jug	2011-12-05	06:51:23	19.12	red	2
1673	17	Jug	2011-12-05	07:36:49	4.76	NA	2
1673	17	Jug	2011-12-05	07:38:09	68.16	white	2
1673	17	Jug	2011-12-05	07:40:54	3.11	NA	2
1673	17	Jug	2011-12-05	08:06:28	24.57	NA	2
1673	17	Jug	2011-12-05	10:17:28	1.65	NA	2
1673	17	Jug	2011-12-05	10:19:13	24.63	NA	2
1673	17	Jug	2011-12-05	10:42:54	4.8	NA	2
1673	17	Jug	2011-12-05	10:45:08	143.14	NA	2
1673	17	Jug	2011-12-05	10:50:53	21.72	NA	2
1673	17	Jug	2011-12-05	13:32:46	108.21	NA	2
1673	17	Jug	2011-12-05	14:15:36	64.16	NA	2
1673	17	Jug	2011-12-05	16:14:09	28.23	NA	2
1673	17	Jug	2011-12-05	17:17:38	56.16	NA	2
1673	17	Jug	2011-12-05	20:13:25	34.33	NA	2
1673	17	Jug	2011-12-06	05:11:16	79.53	NA	2
1673	17	Jug	2011-12-06	05:14:06	1.85	red	2
1673	17	Jug	2011-12-06	05:15:11	56.16	NA	2
1673	17	Jug	2011-12-06	07:53:01	4.85	NA	2
1673	17	Jug	2011-12-06	11:52:13	28.58	NA	2
1673	17	Jug	2011-12-06	11:53:54	4.9	NA	2
1673	17	Jug	2011-12-06	11:55:17	125.73	red	2
1673	17	Jug	2011-12-06	12:00:27	160.8	NA	2
1673	17	Jug	2011-12-06	12:08:33	15.17	NA	2
1673	17	Jug	2011-12-06	12:33:17	81.03	NA	2
1673	17	Jug	2011-12-06	13:40:07	12.76	white	2
1673	17	Jug	2011-12-06	13:43:07	17.57	NA	2
1673	17	Jug	2011-12-06	13:46:53	78.92	red	2
1673	17	Jug	2011-12-06	13:53:23	12.97	white	2
1673	17	Jug	2011-12-06	16:50:47	77.97	NA	2
1673	17	Jug	2011-12-07	05:42:26	61.61	NA	2
1673	17	Jug	2011-12-07	05:44:53	8.36	red	2
1673	17	Jug	2011-12-07	05:46:27	70.97	NA	2
1673	17	Jug	2011-12-07	08:50:33	15.77	NA	2
1673	17	Jug	2011-12-07	10:22:22	136.73	NA	2
1934	18	Jug	2011-12-02	13:03:15	31.43	NA	1
1934	18	Jug	2011-12-02	15:52:44	19.32	NA	1
1934	18	Jug	2011-12-02	18:31:10	8.11	NA	1
1934	18	Jug	2011-12-03	09:08:21	3.5	NA	1
1934	18	Jug	2011-12-03	09:23:11	37.24	NA	1
1934	18	Jug	2011-12-03	09:38:39	5.75	NA	1
1934	18	Jug	2011-12-04	07:36:53	23.93	NA	1
1934	18	Jug	2011-12-04	09:23:34	6.45	NA	1
1934	18	Jug	2011-12-04	09:27:02	3.41	NA	1
1934	18	Jug	2011-12-04	17:21:16	6.25	NA	1
1934	18	Jug	2011-12-04	17:26:22	4.76	NA	1
1934	18	Jug	2011-12-05	07:34:51	7.7	NA	1
1934	18	Jug	2011-12-05	07:45:12	24.43	NA	1
1934	18	Jug	2011-12-05	13:54:18	8.01	NA	1
1934	18	Jug	2011-12-05	13:55:47	3.65	NA	1
1934	18	Jug	2011-12-06	07:24:40	11.81	NA	1
1934	18	Jug	2011-12-06	08:17:45	7.81	NA	1
1934	18	Jug	2011-12-06	09:12:41	27.82	NA	1
1934	18	Jug	2011-12-06	18:39:57	8.46	NA	1
1934	18	Jug	2011-12-06	18:41:29	6.61	NA	1
1934	18	Jug	2011-12-06	19:01:10	3.2	NA	1
1934	18	Jug	2011-12-07	04:04:42	14.32	NA	1
1934	18	Jug	2011-12-07	07:33:23	16.41	NA	1
1934	18	Jug	2011-12-07	07:37:49	6.21	NA	1
1934	18	Jug	2011-12-07	08:15:55	23.32	NA	1
1497	22	Jug	2011-12-05	10:08:28	5.81	NA	1
1497	22	Jug	2011-12-05	11:56:29	34.08	NA	1
1497	22	Jug	2011-12-05	14:20:51	12.11	NA	1
1497	22	Jug	2011-12-05	15:48:08	5.51	NA	1
1497	22	Jug	2011-12-05	17:12:57	115.41	NA	1
1497	22	Jug	2011-12-05	17:16:41	24.83	NA	1
1497	22	Jug	2011-12-05	17:24:51	58.81	NA	1
1497	22	Jug	2011-12-05	17:39:16	20.87	NA	1
1497	22	Jug	2011-12-05	18:23:06	5.55	NA	1
1497	22	Jug	2011-12-05	20:47:51	16.92	NA	1
1497	22	Jug	2011-12-05	21:05:33	78.07	NA	1
1497	22	Jug	2011-12-05	21:47:53	56.26	white	1
1497	22	Jug	2011-12-05	21:55:15	13.76	NA	1
1497	22	Jug	2011-12-05	22:14:36	5.81	NA	1
1497	22	Jug	2011-12-06	04:29:55	8.25	NA	1
1497	22	Jug	2011-12-06	05:09:35	13.27	NA	1
1497	22	Jug	2011-12-06	05:11:26	1.6	NA	1
1497	22	Jug	2011-12-06	06:08:03	7.56	NA	1
1497	22	Jug	2011-12-06	06:10:06	3	NA	1
1497	22	Jug	2011-12-06	06:13:04	28.68	NA	1
1497	22	Jug	2011-12-06	06:22:02	31.68	NA	1
1497	22	Jug	2011-12-06	06:44:34	18.91	NA	1
1497	22	Jug	2011-12-06	06:47:12	26.03	NA	1
1497	22	Jug	2011-12-06	07:49:38	72.77	white	1
1497	22	Jug	2011-12-06	07:53:09	87.33	NA	1
1497	22	Jug	2011-12-06	08:16:07	25.88	NA	1
1497	22	Jug	2011-12-06	08:17:34	29.43	NA	1
1497	22	Jug	2011-12-06	17:07:50	4.9	NA	1
1497	22	Jug	2011-12-06	17:20:13	10.16	NA	1
1497	22	Jug	2011-12-06	17:22:58	6.71	NA	1
1497	22	Jug	2011-12-06	19:51:38	66.82	NA	1
1497	22	Jug	2011-12-06	21:03:16	3.05	NA	1
1497	22	Jug	2011-12-06	21:22:19	150.45	white	1
1497	22	Jug	2011-12-06	21:28:53	94.04	NA	1
1497	22	Jug	2011-12-06	22:22:43	9.96	NA	1
1497	22	Jug	2011-12-06	22:25:19	2	NA	1
1497	22	Jug	2011-12-06	22:53:03	1.3	NA	1
1497	22	Jug	2011-12-06	22:56:03	19.27	NA	1
1497	22	Jug	2011-12-06	23:02:54	48.35	NA	1
1497	22	Jug	2011-12-06	23:06:28	31.18	NA	1
1497	22	Jug	2011-12-07	00:08:20	12.11	NA	1
1497	22	Jug	2011-12-07	03:39:54	10.36	NA	1
1497	22	Jug	2011-12-07	03:45:19	48.3	NA	1
1497	22	Jug	2011-12-07	03:48:12	15.66	NA	1
1497	22	Jug	2011-12-07	05:47:20	20.62	NA	1
1497	22	Jug	2011-12-07	06:26:16	27.53	NA	1
1497	22	Jug	2011-12-07	06:28:56	3.9	NA	1
1497	22	Jug	2011-12-07	06:30:27	22.72	NA	1
1497	22	Jug	2011-12-07	07:37:28	12.67	NA	1
1497	22	Jug	2011-12-07	08:09:11	100.05	white	1
1497	22	Jug	2011-12-07	14:16:46	5.6	NA	1
1497	22	Jug	2011-12-07	17:13:23	27.88	NA	1
1497	22	Jug	2011-12-07	17:19:42	34.63	NA	1
1497	22	Jug	2011-12-07	17:23:25	25.48	NA	1
1497	22	Jug	2011-12-07	17:27:52	3.55	NA	1
1497	22	Jug	2011-12-08	05:00:32	106.95	NA	1
1497	22	Jug	2011-12-08	05:07:50	76.88	NA	1
1497	22	Jug	2011-12-08	12:07:12	51.95	NA	1
1497	22	Jug	2011-12-08	12:14:46	12.66	NA	1
1497	22	Jug	2011-12-08	14:00:52	32.28	NA	1
1497	22	Jug	2011-12-08	19:22:59	13.27	NA	1
1497	22	Jug	2011-12-08	20:59:17	40.29	NA	1
1497	22	Jug	2011-12-08	21:37:08	20.12	NA	1
1497	22	Jug	2011-12-08	21:41:19	4.41	NA	1
1497	22	Jug	2011-12-08	21:44:27	36.89	NA	1
1497	22	Jug	2011-12-08	21:48:40	11.16	NA	1
1497	22	Jug	2011-12-09	04:39:18	1.05	NA	1
1497	22	Jug	2011-12-09	04:42:46	35.33	NA	1
1497	22	Jug	2011-12-09	05:11:55	5.31	NA	1
1497	22	Jug	2011-12-09	07:08:46	20.77	NA	1
1497	22	Jug	2011-12-09	07:13:47	11.56	NA	1
1497	22	Jug	2011-12-09	07:18:24	44.34	NA	1
1497	22	Jug	2011-12-09	07:34:04	35.49	NA	1
1497	22	Jug	2011-12-09	07:35:42	1.65	NA	1
1497	22	Jug	2011-12-09	07:54:25	16.22	NA	1
1497	22	Jug	2011-12-09	07:56:25	39.44	NA	1
1497	22	Jug	2011-12-09	08:01:58	66.17	NA	1
1497	22	Jug	2011-12-09	08:06:11	143.14	white	1
1497	22	Jug	2011-12-09	08:12:51	40.19	NA	1
1497	22	Jug	2011-12-09	08:15:51	3.96	NA	1
1497	22	Jug	2011-12-09	08:21:40	87.69	NA	1
1497	22	Jug	2011-12-09	08:25:31	102.4	red	1
1497	22	Jug	2011-12-09	08:30:19	5.95	NA	1
1497	22	Jug	2011-12-09	08:34:06	26.03	white	1
1497	22	Jug	2011-12-09	08:37:00	1.16	NA	1
1497	22	Jug	2011-12-09	12:20:25	8.45	NA	1
1497	22	Jug	2011-12-09	13:39:28	31.88	NA	1
1497	22	Jug	2011-12-09	13:42:27	11.02	NA	1
1497	22	Jug	2011-12-09	13:43:55	15.11	NA	1
1497	22	Jug	2011-12-10	07:20:30	33.18	NA	1
1497	22	Jug	2011-12-10	07:24:51	34.99	NA	1
1497	22	Jug	2011-12-10	07:29:29	8.3	NA	1
1497	22	Jug	2011-12-10	07:41:04	46.1	NA	1
1497	22	Jug	2011-12-10	07:44:27	15.56	NA	1
1497	22	Jug	2011-12-10	07:46:20	66.57	red	1
1668	24	Jug	2011-12-05	10:30:42	4.76	NA	1
1668	24	Jug	2011-12-05	10:33:26	26.42	NA	1
1668	24	Jug	2011-12-05	10:35:45	3.66	NA	1
1668	24	Jug	2011-12-05	11:02:16	7.96	NA	1
1668	24	Jug	2011-12-05	11:57:54	25.52	NA	1
1668	24	Jug	2011-12-05	12:23:38	1.45	NA	1
1668	24	Jug	2011-12-05	12:33:45	4.86	NA	1
1668	24	Jug	2011-12-05	12:35:40	60.26	NA	1
1668	24	Jug	2011-12-05	13:11:51	7.95	NA	1
1668	24	Jug	2011-12-05	13:33:51	6.16	NA	1
1668	24	Jug	2011-12-05	13:36:55	21.07	NA	1
1668	24	Jug	2011-12-05	13:47:41	13.76	NA	1
1668	24	Jug	2011-12-05	13:51:00	62.31	NA	1
1668	24	Jug	2011-12-05	13:53:59	109.31	red	1
1668	24	Jug	2011-12-05	13:58:11	12.06	NA	1
1668	24	Jug	2011-12-05	14:43:49	28.88	NA	1
1668	24	Jug	2011-12-05	14:48:07	11.11	NA	1
1668	24	Jug	2011-12-05	15:08:57	110.16	NA	1
1668	24	Jug	2011-12-05	15:13:13	5.2	NA	1
1668	24	Jug	2011-12-05	15:14:36	60.21	NA	1
1668	24	Jug	2011-12-05	15:29:50	63.16	white	1
1668	24	Jug	2011-12-05	15:32:54	127.72	NA	1
1668	24	Jug	2011-12-05	15:37:47	217.82	white	1
1668	24	Jug	2011-12-05	15:45:29	163.61	white	1
1668	24	Jug	2011-12-05	16:29:06	5.8	NA	1
1668	24	Jug	2011-12-05	17:35:46	28.53	red	1
1668	24	Jug	2011-12-05	18:25:38	122.62	red	1
1668	24	Jug	2011-12-05	21:35:19	2.4	NA	1
1668	24	Jug	2011-12-05	21:37:35	1.75	NA	1
1668	24	Jug	2011-12-05	21:59:59	25.43	NA	1
1668	24	Jug	2011-12-05	22:02:49	11.46	NA	1
1668	24	Jug	2011-12-05	22:04:08	49.15	NA	1
1668	24	Jug	2011-12-05	22:06:54	42.24	NA	1
1668	24	Jug	2011-12-05	22:10:37	14.61	NA	1
1668	24	Jug	2011-12-05	22:13:49	50.65	red	1
1668	24	Jug	2011-12-05	23:07:45	5.1	NA	1
1668	24	Jug	2011-12-06	05:39:46	8.96	NA	1
1668	24	Jug	2011-12-06	05:44:33	1.96	red	1
1668	24	Jug	2011-12-06	05:45:38	14.46	NA	1
1668	24	Jug	2011-12-06	06:44:20	14.81	NA	1
1668	24	Jug	2011-12-06	06:47:29	64.52	NA	1
1668	24	Jug	2011-12-06	06:51:23	37.74	NA	1
1668	24	Jug	2011-12-06	06:56:01	49	red	1
1668	24	Jug	2011-12-06	07:00:11	25.32	red	1
1668	24	Jug	2011-12-06	07:01:58	3.5	NA	1
1668	24	Jug	2011-12-06	07:03:08	12.17	NA	1
1668	24	Jug	2011-12-06	07:05:27	6.85	NA	1
1668	24	Jug	2011-12-06	07:08:26	13.87	NA	1
1668	24	Jug	2011-12-06	07:11:42	9.96	NA	1
1668	24	Jug	2011-12-06	07:38:53	1.8	NA	1
1668	24	Jug	2011-12-06	07:52:11	9.61	NA	1
1668	24	Jug	2011-12-06	07:58:09	34.08	white	1
1668	24	Jug	2011-12-06	08:00:36	9.46	NA	1
1668	24	Jug	2011-12-06	08:03:12	47.5	white	1
1668	24	Jug	2011-12-06	08:05:15	129.97	NA	1
1668	24	Jug	2011-12-06	08:10:04	9.61	NA	1
1668	24	Jug	2011-12-06	08:11:45	7.91	NA	1
1668	24	Jug	2011-12-06	08:32:33	22.27	NA	1
1668	24	Jug	2011-12-06	08:36:44	69.67	NA	1
1668	24	Jug	2011-12-06	08:50:46	76.67	NA	1
1668	24	Jug	2011-12-06	08:55:12	39.29	NA	1
1668	24	Jug	2011-12-06	15:49:06	7.91	NA	1
1668	24	Jug	2011-12-06	15:52:18	20.02	NA	1
1668	24	Jug	2011-12-06	15:55:40	4.4	NA	1
1668	24	Jug	2011-12-06	16:13:57	103.41	red	1
1668	24	Jug	2011-12-06	16:41:51	7.41	NA	1
1668	24	Jug	2011-12-06	16:51:18	5.26	NA	1
1668	24	Jug	2011-12-06	16:52:24	35.38	NA	1
1668	24	Jug	2011-12-06	16:54:45	7.51	NA	1
1668	24	Jug	2011-12-06	16:59:17	23.02	NA	1
1668	24	Jug	2011-12-06	17:01:10	31.23	NA	1
1668	24	Jug	2011-12-06	17:04:56	10.06	NA	1
1668	24	Jug	2011-12-06	17:20:35	57.1	NA	1
1668	24	Jug	2011-12-06	18:10:58	57.51	NA	1
1668	24	Jug	2011-12-06	18:15:30	8.11	NA	1
1668	24	Jug	2011-12-06	18:17:49	87.38	NA	1
1668	24	Jug	2011-12-06	18:21:12	21.62	NA	1
1668	24	Jug	2011-12-06	18:24:21	112.01	red	1
1668	24	Jug	2011-12-06	18:33:26	12.02	NA	1
1668	24	Jug	2011-12-06	18:36:23	10.71	NA	1
1668	24	Jug	2011-12-06	21:28:51	28.67	red	1
1668	24	Jug	2011-12-06	21:30:19	6.71	NA	1
1668	24	Jug	2011-12-06	21:45:57	37.59	NA	1
1668	24	Jug	2011-12-06	21:49:17	80.27	NA	1
1668	24	Jug	2011-12-06	21:52:59	52.86	red	1
1668	24	Jug	2011-12-07	05:56:36	11.81	NA	1
1668	24	Jug	2011-12-07	06:02:38	13.26	NA	1
1668	24	Jug	2011-12-07	06:11:39	12.26	NA	1
1668	24	Jug	2011-12-07	06:13:54	23.43	NA	1
1668	24	Jug	2011-12-07	06:25:05	103.51	red	1
1668	24	Jug	2011-12-07	06:28:49	16.31	NA	1
1668	24	Jug	2011-12-07	06:37:31	66.52	red	1
1668	24	Jug	2011-12-07	06:41:21	60.01	NA	1
1668	24	Jug	2011-12-07	06:43:27	3.11	NA	1
1668	24	Jug	2011-12-07	06:44:44	102.2	NA	1
1668	24	Jug	2011-12-07	06:48:20	6.6	NA	1
1668	24	Jug	2011-12-07	06:49:41	96.3	white	1
1668	24	Jug	2011-12-07	06:59:35	28.97	NA	1
1668	24	Jug	2011-12-07	07:17:12	5.86	NA	1
1668	24	Jug	2011-12-07	07:39:31	21.17	NA	1
1668	24	Jug	2011-12-07	07:43:49	17.02	red	1
1668	24	Jug	2011-12-07	08:13:09	96.99	red	1
1668	24	Jug	2011-12-07	08:16:44	2.9	NA	1
1668	24	Jug	2011-12-07	08:31:12	11.97	NA	1
1668	24	Jug	2011-12-07	08:55:23	3.95	NA	1
1668	24	Jug	2011-12-07	13:31:46	12.31	NA	1
1668	24	Jug	2011-12-07	13:33:01	72.82	NA	1
1206	26	Jug	2011-12-05	12:14:08	17.16	NA	1
1206	26	Jug	2011-12-05	12:25:09	12.87	NA	1
1206	26	Jug	2011-12-05	12:31:35	55.21	NA	1
1206	26	Jug	2011-12-05	12:59:48	57.45	NA	1
1206	26	Jug	2011-12-05	14:07:56	15.01	NA	1
1206	26	Jug	2011-12-05	16:40:50	25.48	NA	1
1206	26	Jug	2011-12-05	16:44:22	4.2	NA	1
1206	26	Jug	2011-12-05	16:46:04	46.5	NA	1
1206	26	Jug	2011-12-05	21:30:42	6.1	NA	1
1206	26	Jug	2011-12-05	21:34:24	7.86	NA	1
1206	26	Jug	2011-12-06	02:46:59	37.19	NA	1
1206	26	Jug	2011-12-06	04:41:27	9.26	NA	1
1206	26	Jug	2011-12-06	05:18:10	63.61	NA	1
1206	26	Jug	2011-12-06	05:21:35	27.73	NA	1
1206	26	Jug	2011-12-06	06:56:01	39.63	NA	1
1206	26	Jug	2011-12-06	08:18:30	40.84	white	1
1206	26	Jug	2011-12-06	08:33:54	11.22	red	1
1206	26	Jug	2011-12-06	10:03:00	155.61	NA	1
1206	26	Jug	2011-12-06	10:54:19	105.45	white	1
1206	26	Jug	2011-12-06	17:14:58	85.58	NA	1
1206	26	Jug	2011-12-06	17:28:19	184.58	white	1
1206	26	Jug	2011-12-06	17:36:19	9.36	NA	1
1206	26	Jug	2011-12-06	17:37:35	100.25	NA	1
1206	26	Jug	2011-12-06	17:47:40	188.48	NA	1
1206	26	Jug	2011-12-06	18:00:36	4.06	NA	1
1206	26	Jug	2011-12-06	18:03:28	23.12	NA	1
1206	26	Jug	2011-12-06	18:06:42	18.87	NA	1
1206	26	Jug	2011-12-06	22:09:15	39.78	NA	1
1206	26	Jug	2011-12-06	22:11:48	8.16	red	1
1206	26	Jug	2011-12-07	01:06:57	19.22	NA	1
1206	26	Jug	2011-12-07	04:46:31	14.81	NA	1
1206	26	Jug	2011-12-07	05:11:55	41.09	NA	1
1206	26	Jug	2011-12-07	08:47:04	123.72	NA	1
1206	26	Jug	2011-12-07	09:11:25	10.51	NA	1
1206	26	Jug	2011-12-07	09:13:32	70.22	NA	1
1206	26	Jug	2011-12-07	09:37:00	15.51	NA	1
1206	26	Jug	2011-12-07	09:41:44	158.86	NA	1
1206	26	Jug	2011-12-07	09:52:35	129.62	white	1
1206	26	Jug	2011-12-07	09:57:57	110.21	white	1
1206	26	Jug	2011-12-07	10:50:17	7.31	NA	1
1206	26	Jug	2011-12-07	12:35:31	24.02	NA	1
1206	26	Jug	2011-12-07	12:40:43	38.14	NA	1
1206	26	Jug	2011-12-07	12:43:45	83.93	NA	1
1206	26	Jug	2011-12-07	12:47:10	12.71	NA	1
1206	26	Jug	2011-12-07	12:48:36	74.17	NA	1
1206	26	Jug	2011-12-07	12:51:45	77.08	NA	1
1206	26	Jug	2011-12-07	14:58:35	3.25	NA	1
1206	26	Jug	2011-12-07	15:24:16	42.19	NA	1
1206	26	Jug	2011-12-07	16:17:18	1.4	NA	1
1206	26	Jug	2011-12-07	16:18:27	8.11	NA	1
1206	26	Jug	2011-12-07	16:47:27	12.96	white	1
1206	26	Jug	2011-12-07	17:11:59	12.57	NA	1
1206	26	Jug	2011-12-07	17:14:03	7.05	NA	1
1206	26	Jug	2011-12-07	17:15:47	45.2	NA	1
1206	26	Jug	2011-12-08	02:02:19	79.02	NA	1
1206	26	Jug	2011-12-08	04:47:59	16.32	NA	1
1206	26	Jug	2011-12-08	06:44:03	6.96	NA	1
1206	26	Jug	2011-12-08	06:46:20	36.28	NA	1
1206	26	Jug	2011-12-08	17:16:40	111.31	NA	1
1206	26	Jug	2011-12-08	17:22:25	5.45	NA	1
1206	26	Jug	2011-12-08	17:24:59	77.78	red	1
1206	26	Jug	2011-12-08	17:28:20	3.35	NA	1
1206	26	Jug	2011-12-08	17:32:52	1.05	NA	1
1206	26	Jug	2011-12-08	17:39:53	7.86	NA	1
1206	26	Jug	2011-12-08	17:42:32	16.21	NA	1
1206	26	Jug	2011-12-08	17:55:06	22.58	white	1
1206	26	Jug	2011-12-08	17:57:47	108.55	white	1
1206	26	Jug	2011-12-08	20:20:57	66.07	NA	1
1206	26	Jug	2011-12-09	04:38:36	70.22	NA	1
1206	26	Jug	2011-12-09	07:37:37	79.17	NA	1
1206	26	Jug	2011-12-09	09:24:18	9.46	NA	1
1206	26	Jug	2011-12-09	09:25:54	44.75	NA	1
1206	26	Jug	2011-12-09	09:31:26	67.76	NA	1
1206	26	Jug	2011-12-09	09:36:25	126.93	white	1
1206	26	Jug	2011-12-09	11:18:50	10.16	NA	1
1206	26	Jug	2011-12-09	11:20:26	65.77	NA	1
1206	26	Jug	2011-12-09	11:28:18	51	NA	1
1206	26	Jug	2011-12-09	16:45:54	25.53	NA	1
1206	26	Jug	2011-12-09	16:47:19	12.71	NA	1
1206	26	Jug	2011-12-09	16:48:46	5.66	NA	1
1206	26	Jug	2011-12-09	16:59:00	56.16	NA	1
1206	26	Jug	2011-12-09	17:05:13	22.72	NA	1
1206	26	Jug	2011-12-09	17:07:52	87.03	NA	1
1206	26	Jug	2011-12-09	17:10:26	15.97	red	1
1206	26	Jug	2011-12-09	17:15:05	105.11	red	1
1206	26	Jug	2011-12-09	17:20:15	81.93	NA	1
1206	26	Jug	2011-12-09	17:30:26	17.32	NA	1
1206	26	Jug	2011-12-09	17:48:14	36.64	NA	1
1206	26	Jug	2011-12-09	17:52:49	1.3	NA	1
1206	26	Jug	2011-12-09	17:58:35	10.71	NA	1
1206	26	Jug	2011-12-09	18:01:25	35.73	NA	1
1206	26	Jug	2011-12-09	18:06:20	22.93	NA	1
1984	27	Jug	2011-12-08	10:03:50	51.4	NA	2
1984	27	Jug	2011-12-08	11:10:10	4.6	NA	2
1984	27	Jug	2011-12-08	17:09:32	6.66	NA	2
1984	27	Jug	2011-12-08	17:48:39	4.8	NA	2
1984	27	Jug	2011-12-08	18:31:27	3.86	NA	2
1984	27	Jug	2011-12-08	20:54:41	29.47	red	2
1984	27	Jug	2011-12-08	21:17:22	3.66	NA	2
1984	27	Jug	2011-12-08	22:50:48	3.6	NA	2
1984	27	Jug	2011-12-09	08:11:18	60.56	NA	2
1984	27	Jug	2011-12-09	08:13:49	10.76	NA	2
1984	27	Jug	2011-12-09	08:18:46	11.36	red	2
1984	27	Jug	2011-12-09	08:36:51	6.71	NA	2
1984	27	Jug	2011-12-09	08:42:08	1.1	NA	2
1984	27	Jug	2011-12-09	08:46:45	70.87	white	2
1984	27	Jug	2011-12-09	08:51:24	35.33	NA	2
1984	27	Jug	2011-12-09	08:59:40	3.86	NA	2
1984	27	Jug	2011-12-10	09:03:20	98.09	NA	2
1984	27	Jug	2011-12-10	09:07:37	55.56	NA	2
2143	29	Jug	2011-12-08	10:23:09	6.81	NA	2
2143	29	Jug	2011-12-08	10:36:23	72.87	red	2
2143	29	Jug	2011-12-08	10:43:30	21.37	NA	2
2143	29	Jug	2011-12-08	13:10:32	34.58	NA	2
2143	29	Jug	2011-12-08	14:48:02	58.31	NA	2
2143	29	Jug	2011-12-08	14:53:36	5.11	NA	2
2143	29	Jug	2011-12-08	14:56:03	15.71	red	2
2143	29	Jug	2011-12-08	15:15:34	38.29	NA	2
2143	29	Jug	2011-12-08	16:11:48	97.09	NA	2
2143	29	Jug	2011-12-08	16:15:36	12.21	NA	2
2143	29	Jug	2011-12-08	16:17:17	47.05	red	2
2143	29	Jug	2011-12-08	16:22:31	35.83	NA	2
2143	29	Jug	2011-12-08	16:27:07	91.84	NA	2
2143	29	Jug	2011-12-08	16:37:13	18.72	NA	2
2143	29	Jug	2011-12-08	16:41:14	2.55	NA	2
2143	29	Jug	2011-12-08	16:43:30	2.06	NA	2
2143	29	Jug	2011-12-08	16:46:19	42.84	NA	2
2143	29	Jug	2011-12-08	16:56:31	16.91	NA	2
2143	29	Jug	2011-12-08	16:58:06	5.46	NA	2
2143	29	Jug	2011-12-08	17:00:19	10.56	NA	2
2143	29	Jug	2011-12-08	17:04:57	49.74	red	2
2143	29	Jug	2011-12-08	18:26:30	12.17	NA	2
2143	29	Jug	2011-12-08	18:27:47	12.66	NA	2
2143	29	Jug	2011-12-08	18:30:19	52	NA	2
2143	29	Jug	2011-12-08	18:34:25	1.3	NA	2
2143	29	Jug	2011-12-08	21:27:36	44.99	red	2
2143	29	Jug	2011-12-08	21:57:04	65.82	NA	2
2143	29	Jug	2011-12-08	22:07:52	69.16	NA	2
2143	29	Jug	2011-12-08	23:41:02	39.64	NA	2
2143	29	Jug	2011-12-09	01:52:59	21.07	NA	2
2143	29	Jug	2011-12-09	03:24:35	24.68	NA	2
2143	29	Jug	2011-12-09	05:27:13	21.47	NA	2
2143	29	Jug	2011-12-09	05:28:34	175.72	NA	2
2143	29	Jug	2011-12-09	06:06:04	19.32	NA	2
2143	29	Jug	2011-12-09	06:08:45	12.31	NA	2
2143	29	Jug	2011-12-09	06:16:21	103.95	NA	2
2143	29	Jug	2011-12-09	06:20:41	29.23	NA	2
2143	29	Jug	2011-12-09	06:24:17	76.02	NA	2
2143	29	Jug	2011-12-09	06:32:48	1.4	NA	2
2143	29	Jug	2011-12-09	06:48:59	81.83	NA	2
2143	29	Jug	2011-12-09	06:53:45	84.03	NA	2
2143	29	Jug	2011-12-09	06:59:53	9.86	red	2
2143	29	Jug	2011-12-09	07:03:52	33.83	NA	2
2143	29	Jug	2011-12-09	07:08:25	21.52	NA	2
2143	29	Jug	2011-12-09	07:09:58	57.26	NA	2
2143	29	Jug	2011-12-09	07:13:07	340.39	NA	2
2143	29	Jug	2011-12-09	07:25:00	147.79	NA	2
2143	29	Jug	2011-12-09	07:31:56	35.33	NA	2
2143	29	Jug	2011-12-09	07:53:58	2.81	NA	2
2143	29	Jug	2011-12-09	07:55:13	15.11	NA	2
2143	29	Jug	2011-12-09	07:59:26	12.16	NA	2
2143	29	Jug	2011-12-09	08:02:10	6.16	NA	2
2143	29	Jug	2011-12-09	08:05:56	34.13	red	2
2143	29	Jug	2011-12-09	08:11:52	8.16	NA	2
2143	29	Jug	2011-12-09	08:13:45	12.81	NA	2
2143	29	Jug	2011-12-09	08:14:58	2	NA	2
2143	29	Jug	2011-12-09	08:17:09	12.21	red	2
2143	29	Jug	2011-12-09	08:32:48	7.56	NA	2
2143	29	Jug	2011-12-09	09:23:36	110.61	NA	2
2143	29	Jug	2011-12-09	09:27:26	1.65	NA	2
2143	29	Jug	2011-12-09	09:39:48	7.81	NA	2
2143	29	Jug	2011-12-09	10:18:07	90.39	NA	2
2143	29	Jug	2011-12-09	10:24:30	116.36	NA	2
2143	29	Jug	2011-12-09	14:07:08	28.03	NA	2
2143	29	Jug	2011-12-09	14:31:45	24.52	NA	2
2143	29	Jug	2011-12-09	14:47:56	17.27	NA	2
2143	29	Jug	2011-12-09	15:32:34	22.67	NA	2
2143	29	Jug	2011-12-09	15:35:42	29.58	NA	2
2143	29	Jug	2011-12-09	15:38:31	107	red	2
2143	29	Jug	2011-12-09	15:53:41	17.97	NA	2
2143	29	Jug	2011-12-09	15:55:51	69.21	NA	2
2143	29	Jug	2011-12-09	15:59:05	1.06	NA	2
2143	29	Jug	2011-12-09	16:00:12	238.88	NA	2
2143	29	Jug	2011-12-09	16:18:19	13.76	NA	2
2143	29	Jug	2011-12-09	18:46:53	6.66	NA	2
2143	29	Jug	2011-12-09	18:48:10	56.85	NA	2
2143	29	Jug	2011-12-09	18:53:07	33.14	NA	2
2143	29	Jug	2011-12-09	20:42:56	45.69	NA	2
2143	29	Jug	2011-12-09	20:58:33	7.91	NA	2
2143	29	Jug	2011-12-09	20:59:54	36.53	NA	2
2143	29	Jug	2011-12-09	21:05:29	16.07	NA	2
2143	29	Jug	2011-12-09	21:14:48	4.65	NA	2
2143	29	Jug	2011-12-09	22:48:38	28.93	NA	2
2143	29	Jug	2011-12-09	23:38:23	56.66	NA	2
2143	29	Jug	2011-12-09	23:46:46	27.27	NA	2
2143	29	Jug	2011-12-10	00:41:29	68.67	NA	2
2143	29	Jug	2011-12-10	02:27:07	63.71	NA	2
2143	29	Jug	2011-12-10	06:20:38	44.2	NA	2
2143	29	Jug	2011-12-10	06:37:09	3.35	NA	2
2143	29	Jug	2011-12-10	06:44:52	3.15	NA	2
2143	29	Jug	2011-12-10	06:47:32	71.72	NA	2
2143	29	Jug	2011-12-10	06:53:25	57.61	NA	2
2143	29	Jug	2011-12-10	07:00:55	39.49	NA	2
2143	29	Jug	2011-12-10	07:06:35	65.46	red	2
2143	29	Jug	2011-12-10	07:12:41	75.47	NA	2
2143	29	Jug	2011-12-10	07:17:25	23.68	red	2
2143	29	Jug	2011-12-10	07:24:24	49.05	NA	2
2143	29	Jug	2011-12-10	07:27:17	176.78	red	2
2143	29	Jug	2011-12-10	08:00:01	30.88	NA	2
2143	29	Jug	2011-12-10	08:34:28	18.32	NA	2
2143	29	Jug	2011-12-10	08:51:54	155.65	NA	2
2143	29	Jug	2011-12-10	09:19:59	9.86	NA	2
2143	29	Jug	2011-12-10	09:25:19	16.82	red	2
2143	29	Jug	2011-12-10	09:29:20	7.56	NA	2
2143	29	Jug	2011-12-10	09:32:46	70.82	NA	2
1751	31	Jug	2011-12-08	11:25:09	8.06	NA	2
1751	31	Jug	2011-12-08	12:38:23	22.17	NA	2
1751	31	Jug	2011-12-08	13:30:10	16.82	NA	2
1751	31	Jug	2011-12-08	14:30:27	12.36	NA	2
1751	31	Jug	2011-12-08	14:32:01	9.91	NA	2
1751	31	Jug	2011-12-08	14:35:30	21.17	NA	2
1751	31	Jug	2011-12-08	15:36:38	19.38	NA	2
1751	31	Jug	2011-12-08	16:16:19	31.53	red	2
1751	31	Jug	2011-12-08	16:53:17	82.48	NA	2
1751	31	Jug	2011-12-08	17:10:08	90.59	NA	2
1751	31	Jug	2011-12-08	17:26:22	73.27	NA	2
1751	31	Jug	2011-12-08	18:40:51	9.56	NA	2
1751	31	Jug	2011-12-08	18:55:20	3.45	NA	2
1751	31	Jug	2011-12-08	19:10:51	21.42	NA	2
1751	31	Jug	2011-12-08	20:06:27	4.86	NA	2
1751	31	Jug	2011-12-08	22:36:09	17.66	NA	2
1751	31	Jug	2011-12-09	05:34:21	3.96	NA	2
1751	31	Jug	2011-12-09	06:19:51	6.9	NA	2
1751	31	Jug	2011-12-09	06:23:17	6.21	NA	2
1751	31	Jug	2011-12-09	06:40:24	47.59	red	2
1751	31	Jug	2011-12-09	08:02:29	1.91	NA	2
1751	31	Jug	2011-12-09	08:22:54	61.06	NA	2
1751	31	Jug	2011-12-09	10:38:22	14.97	NA	2
1751	31	Jug	2011-12-09	13:31:26	5.35	red	2
1751	31	Jug	2011-12-09	13:48:20	7.71	NA	2
1751	31	Jug	2011-12-09	16:02:24	21.52	NA	2
1751	31	Jug	2011-12-09	16:09:33	1.2	NA	2
1751	31	Jug	2011-12-09	17:49:23	84.94	NA	2
1751	31	Jug	2011-12-09	17:53:02	2.3	NA	2
1751	31	Jug	2011-12-09	17:54:31	71.92	NA	2
1751	31	Jug	2011-12-09	19:18:23	7.81	NA	2
1751	31	Jug	2011-12-09	19:28:32	24.52	NA	2
1751	31	Jug	2011-12-09	19:30:37	3.55	NA	2
1751	31	Jug	2011-12-09	21:18:40	6.36	NA	2
1751	31	Jug	2011-12-10	08:10:38	6.46	NA	2
1751	31	Jug	2011-12-10	08:14:14	67.56	NA	2
1751	31	Jug	2011-12-10	08:21:12	2.55	white	2
1751	31	Jug	2011-12-10	08:27:16	1.15	NA	2
1751	31	Jug	2011-12-10	08:37:13	34.14	NA	2
1751	31	Jug	2011-12-10	16:02:28	14.61	NA	2
1751	31	Jug	2011-12-10	16:15:06	2.75	NA	2
1751	31	Jug	2011-12-10	20:37:00	4.81	NA	2
1751	31	Jug	2011-12-10	20:40:19	28.63	NA	2
1751	31	Jug	2011-12-11	08:47:17	1.95	NA	2
1751	31	Jug	2011-12-11	11:22:16	2.25	NA	2
1751	31	Jug	2011-12-11	11:24:02	5.71	NA	2
1751	31	Jug	2011-12-11	11:28:54	3.1	NA	2
1751	31	Jug	2011-12-11	11:32:01	12.61	NA	2
1751	31	Jug	2011-12-11	12:45:44	13.56	red	2
1751	31	Jug	2011-12-11	12:48:23	159.81	NA	2
1751	31	Jug	2011-12-11	12:54:22	87.23	red	2
1751	31	Jug	2011-12-11	13:06:18	23.93	red	2
1751	31	Jug	2011-12-11	13:07:46	7.15	NA	2
1751	31	Jug	2011-12-11	13:09:19	20.57	red	2
1751	31	Jug	2011-12-12	07:38:27	6.21	red	2
1751	31	Jug	2011-12-12	08:14:19	17.61	NA	2
1751	31	Jug	2011-12-12	08:37:21	85.69	NA	2
1751	31	Jug	2011-12-12	08:49:56	31.98	NA	2
1751	31	Jug	2011-12-12	08:54:06	28.83	NA	2
1751	31	Jug	2011-12-12	09:02:15	13.11	NA	2
1751	31	Jug	2011-12-12	09:58:58	8.16	NA	2
1751	31	Jug	2011-12-12	10:01:45	3.45	white	2
1751	31	Jug	2011-12-12	10:03:10	7.41	NA	2
1751	31	Jug	2011-12-12	10:06:44	30.48	NA	2
1751	31	Jug	2011-12-12	11:01:03	35.33	NA	2
1751	31	Jug	2011-12-12	12:17:33	35.19	red	2
1751	31	Jug	2011-12-12	12:19:47	5.95	red	2
2161	35	Jug	2011-12-08	11:49:17	17.37	NA	2
2161	35	Jug	2011-12-08	12:10:33	13.46	white	2
2161	35	Jug	2011-12-08	13:40:32	50.41	red	2
2161	35	Jug	2011-12-08	14:24:21	19.22	NA	2
2161	35	Jug	2011-12-08	15:17:33	27.02	NA	2
2161	35	Jug	2011-12-08	15:40:38	20.62	NA	2
2161	35	Jug	2011-12-08	16:18:02	3.46	NA	2
2161	35	Jug	2011-12-08	16:43:01	25.02	NA	2
2161	35	Jug	2011-12-08	18:19:02	5.86	NA	2
2161	35	Jug	2011-12-08	18:21:15	225.27	NA	2
2161	35	Jug	2011-12-08	18:31:20	90.49	white	2
2161	35	Jug	2011-12-08	18:56:02	96.54	white	2
2161	35	Jug	2011-12-08	19:42:17	23.63	NA	2
2161	35	Jug	2011-12-08	19:48:04	11.96	NA	2
2161	35	Jug	2011-12-08	21:22:04	11.56	NA	2
2161	35	Jug	2011-12-08	21:56:43	11.81	red	2
2161	35	Jug	2011-12-08	22:22:32	33.88	NA	2
2161	35	Jug	2011-12-09	04:22:23	16.52	NA	2
2161	35	Jug	2011-12-09	08:26:57	47.15	red	2
2161	35	Jug	2011-12-09	09:06:51	14.31	NA	2
2161	35	Jug	2011-12-09	09:12:40	35.99	NA	2
2161	35	Jug	2011-12-09	09:14:18	104.2	white	2
2161	35	Jug	2011-12-09	09:29:22	21.67	NA	2
2161	35	Jug	2011-12-09	09:55:23	18.92	NA	2
2161	35	Jug	2011-12-09	09:56:48	157.2	white	2
2161	35	Jug	2011-12-09	14:24:13	14.36	NA	2
2161	35	Jug	2011-12-09	14:29:42	17.22	NA	2
2161	35	Jug	2011-12-09	14:48:08	7.91	NA	2
2161	35	Jug	2011-12-09	16:29:32	8.86	NA	2
2161	35	Jug	2011-12-09	17:50:45	31.63	NA	2
2161	35	Jug	2011-12-09	17:52:21	6.81	NA	2
2161	35	Jug	2011-12-09	18:08:27	118.11	NA	2
2161	35	Jug	2011-12-09	19:23:36	71.42	white	2
2161	35	Jug	2011-12-09	19:26:05	54.7	NA	2
2161	35	Jug	2011-12-09	20:10:16	3.61	NA	2
2161	35	Jug	2011-12-09	20:42:47	17.91	NA	2
2161	35	Jug	2011-12-09	20:47:50	23.48	NA	2
2161	35	Jug	2011-12-09	21:34:10	5.15	NA	2
2161	35	Jug	2011-12-09	22:01:59	4.61	NA	2
2161	35	Jug	2011-12-09	22:12:51	54.25	NA	2
2161	35	Jug	2011-12-09	23:19:58	12.66	NA	2
2161	35	Jug	2011-12-10	02:09:24	12.06	NA	2
2161	35	Jug	2011-12-10	05:35:43	11.76	NA	2
2161	35	Jug	2011-12-10	06:56:47	27.48	NA	2
2161	35	Jug	2011-12-10	07:22:42	69.62	red	2
2161	35	Jug	2011-12-10	07:25:01	4.05	NA	2
2161	35	Jug	2011-12-10	08:14:48	9.06	NA	2
2161	35	Jug	2011-12-10	08:20:05	48.95	NA	2
2161	35	Jug	2011-12-10	08:48:02	46.29	NA	2
2161	35	Jug	2011-12-10	08:54:24	54.26	red	2
2161	35	Jug	2011-12-10	09:49:34	12.01	NA	2
2161	35	Jug	2011-12-10	10:40:26	27.38	NA	2
2161	35	Jug	2011-12-10	10:42:28	22.57	NA	2
2161	35	Jug	2011-12-10	10:44:22	17.67	NA	2
2161	35	Jug	2011-12-10	12:53:06	9.66	NA	2
2161	35	Jug	2011-12-10	14:55:18	8.31	NA	2
2161	35	Jug	2011-12-10	15:09:53	7.76	NA	2
2161	35	Jug	2011-12-10	15:11:00	39.99	NA	2
2161	35	Jug	2011-12-10	15:27:01	3.65	NA	2
2161	35	Jug	2011-12-10	19:36:34	65.46	NA	2
2161	35	Jug	2011-12-10	20:15:21	43.05	NA	2
2161	35	Jug	2011-12-10	21:01:25	1.9	NA	2
2161	35	Jug	2011-12-10	21:38:07	30.68	NA	2
2161	35	Jug	2011-12-11	05:04:50	7	NA	2
2161	35	Jug	2011-12-11	05:06:16	38.39	NA	2
2161	35	Jug	2011-12-11	05:28:27	19.12	NA	2
2161	35	Jug	2011-12-11	05:32:00	50.1	NA	2
2161	35	Jug	2011-12-11	06:37:40	13.71	NA	2
2161	35	Jug	2011-12-11	06:59:47	17.62	NA	2
2161	35	Jug	2011-12-11	07:07:14	5.66	NA	2
2161	35	Jug	2011-12-11	07:10:24	51.76	NA	2
2161	35	Jug	2011-12-11	07:12:22	33.28	NA	2
2161	35	Jug	2011-12-11	07:32:50	6.8	NA	2
2161	35	Jug	2011-12-11	08:44:38	17.72	NA	2
2161	35	Jug	2011-12-11	09:08:13	17.87	NA	2
2161	35	Jug	2011-12-11	09:23:35	31.28	NA	2
2161	35	Jug	2011-12-11	09:26:21	12.76	red	2
2161	35	Jug	2011-12-11	09:27:59	26.48	NA	2
2161	35	Jug	2011-12-11	09:32:51	28.02	NA	2
2161	35	Jug	2011-12-11	14:07:46	3.81	NA	2
2161	35	Jug	2011-12-11	16:36:36	5.35	NA	2
2161	35	Jug	2011-12-11	18:57:32	36.79	red	2
2161	35	Jug	2011-12-11	19:16:56	16.31	NA	2
2161	35	Jug	2011-12-11	21:40:33	3.61	NA	2
2161	35	Jug	2011-12-11	22:06:05	8.16	NA	2
2161	35	Jug	2011-12-11	22:28:00	34.43	NA	2
2161	35	Jug	2011-12-12	08:08:19	47.55	NA	2
2161	35	Jug	2011-12-12	08:18:21	21.73	NA	2
2161	35	Jug	2011-12-12	08:57:19	6.05	NA	2
2161	35	Jug	2011-12-12	08:58:47	1.45	NA	2
2161	35	Jug	2011-12-12	09:18:12	5.01	NA	2
2161	35	Jug	2011-12-12	09:55:56	24.97	NA	2
2161	35	Jug	2011-12-12	09:57:38	79.18	NA	2
2161	35	Jug	2011-12-12	10:14:42	1.9	NA	2
2166	37	Jug	2011-12-08	11:43:24	15.72	white	2
2166	37	Jug	2011-12-08	12:12:35	14.61	NA	2
2166	37	Jug	2011-12-08	12:23:39	63.46	NA	2
2166	37	Jug	2011-12-08	12:34:11	37.19	NA	2
2166	37	Jug	2011-12-08	14:09:40	5.8	NA	2
2166	37	Jug	2011-12-08	14:20:05	52.9	NA	2
2166	37	Jug	2011-12-08	16:04:43	26.68	white	2
2166	37	Jug	2011-12-08	17:10:36	7.61	NA	2
2166	37	Jug	2011-12-08	17:34:15	27.47	NA	2
2166	37	Jug	2011-12-08	18:07:02	13.72	NA	2
2166	37	Jug	2011-12-08	19:02:54	5.05	NA	2
2166	37	Jug	2011-12-08	19:05:17	41.54	red	2
2166	37	Jug	2011-12-08	21:13:21	2.4	NA	2
2166	37	Jug	2011-12-08	21:14:28	5.11	NA	2
2166	37	Jug	2011-12-08	21:16:38	6.05	NA	2
2166	37	Jug	2011-12-08	21:20:54	8.96	NA	2
2166	37	Jug	2011-12-08	22:05:16	1.05	NA	2
2166	37	Jug	2011-12-08	22:08:05	4.61	NA	2
2166	37	Jug	2011-12-08	22:10:26	42.34	NA	2
2166	37	Jug	2011-12-08	22:41:34	2.55	NA	2
2166	37	Jug	2011-12-09	00:48:22	19.57	NA	2
2166	37	Jug	2011-12-09	00:51:55	2.5	NA	2
2166	37	Jug	2011-12-09	04:28:51	1.35	NA	2
2166	37	Jug	2011-12-09	04:40:52	48.15	NA	2
2166	37	Jug	2011-12-09	06:16:50	16.01	red	2
2166	37	Jug	2011-12-09	06:50:15	2.66	NA	2
2166	37	Jug	2011-12-09	07:45:04	26.12	NA	2
2166	37	Jug	2011-12-09	08:07:38	8.86	NA	2
2166	37	Jug	2011-12-09	08:36:04	4.76	NA	2
2166	37	Jug	2011-12-09	08:40:57	12.26	NA	2
2166	37	Jug	2011-12-09	09:05:09	57.55	NA	2
2166	37	Jug	2011-12-09	09:48:33	12.32	NA	2
2166	37	Jug	2011-12-09	09:51:11	6.7	NA	2
2166	37	Jug	2011-12-09	10:18:26	3.86	NA	2
2166	37	Jug	2011-12-09	11:27:34	20.22	NA	2
2166	37	Jug	2011-12-09	12:26:11	52.71	NA	2
2166	37	Jug	2011-12-09	12:48:43	1.85	NA	2
2166	37	Jug	2011-12-09	12:57:51	20.47	NA	2
2166	37	Jug	2011-12-09	13:01:19	13.96	NA	2
2166	37	Jug	2011-12-09	13:17:43	6.41	red	2
2166	37	Jug	2011-12-09	13:32:48	32.08	NA	2
2166	37	Jug	2011-12-09	13:37:20	9.71	NA	2
2166	37	Jug	2011-12-09	13:43:16	21.72	NA	2
2166	37	Jug	2011-12-09	13:45:21	5.35	NA	2
2166	37	Jug	2011-12-09	14:43:21	4.06	NA	2
2166	37	Jug	2011-12-09	17:36:16	9.66	NA	2
2166	37	Jug	2011-12-09	17:37:52	31.38	NA	2
2166	37	Jug	2011-12-09	18:11:16	2.05	NA	2
2166	37	Jug	2011-12-09	18:14:00	8.46	NA	2
[truncated: 2,739 more rows]
